# Supplementary material for: Genome-scale metabolic reconstructions of Bifidobacterium adolescentis L2-32 and Faecalibacterium prausnitzii A2-165 and their interaction
Source: PubMed Central journal article supplement (PMC4108055; doi:10.1186/1752-0509-8-41), 2014-04-03

CARBON METABOLISM

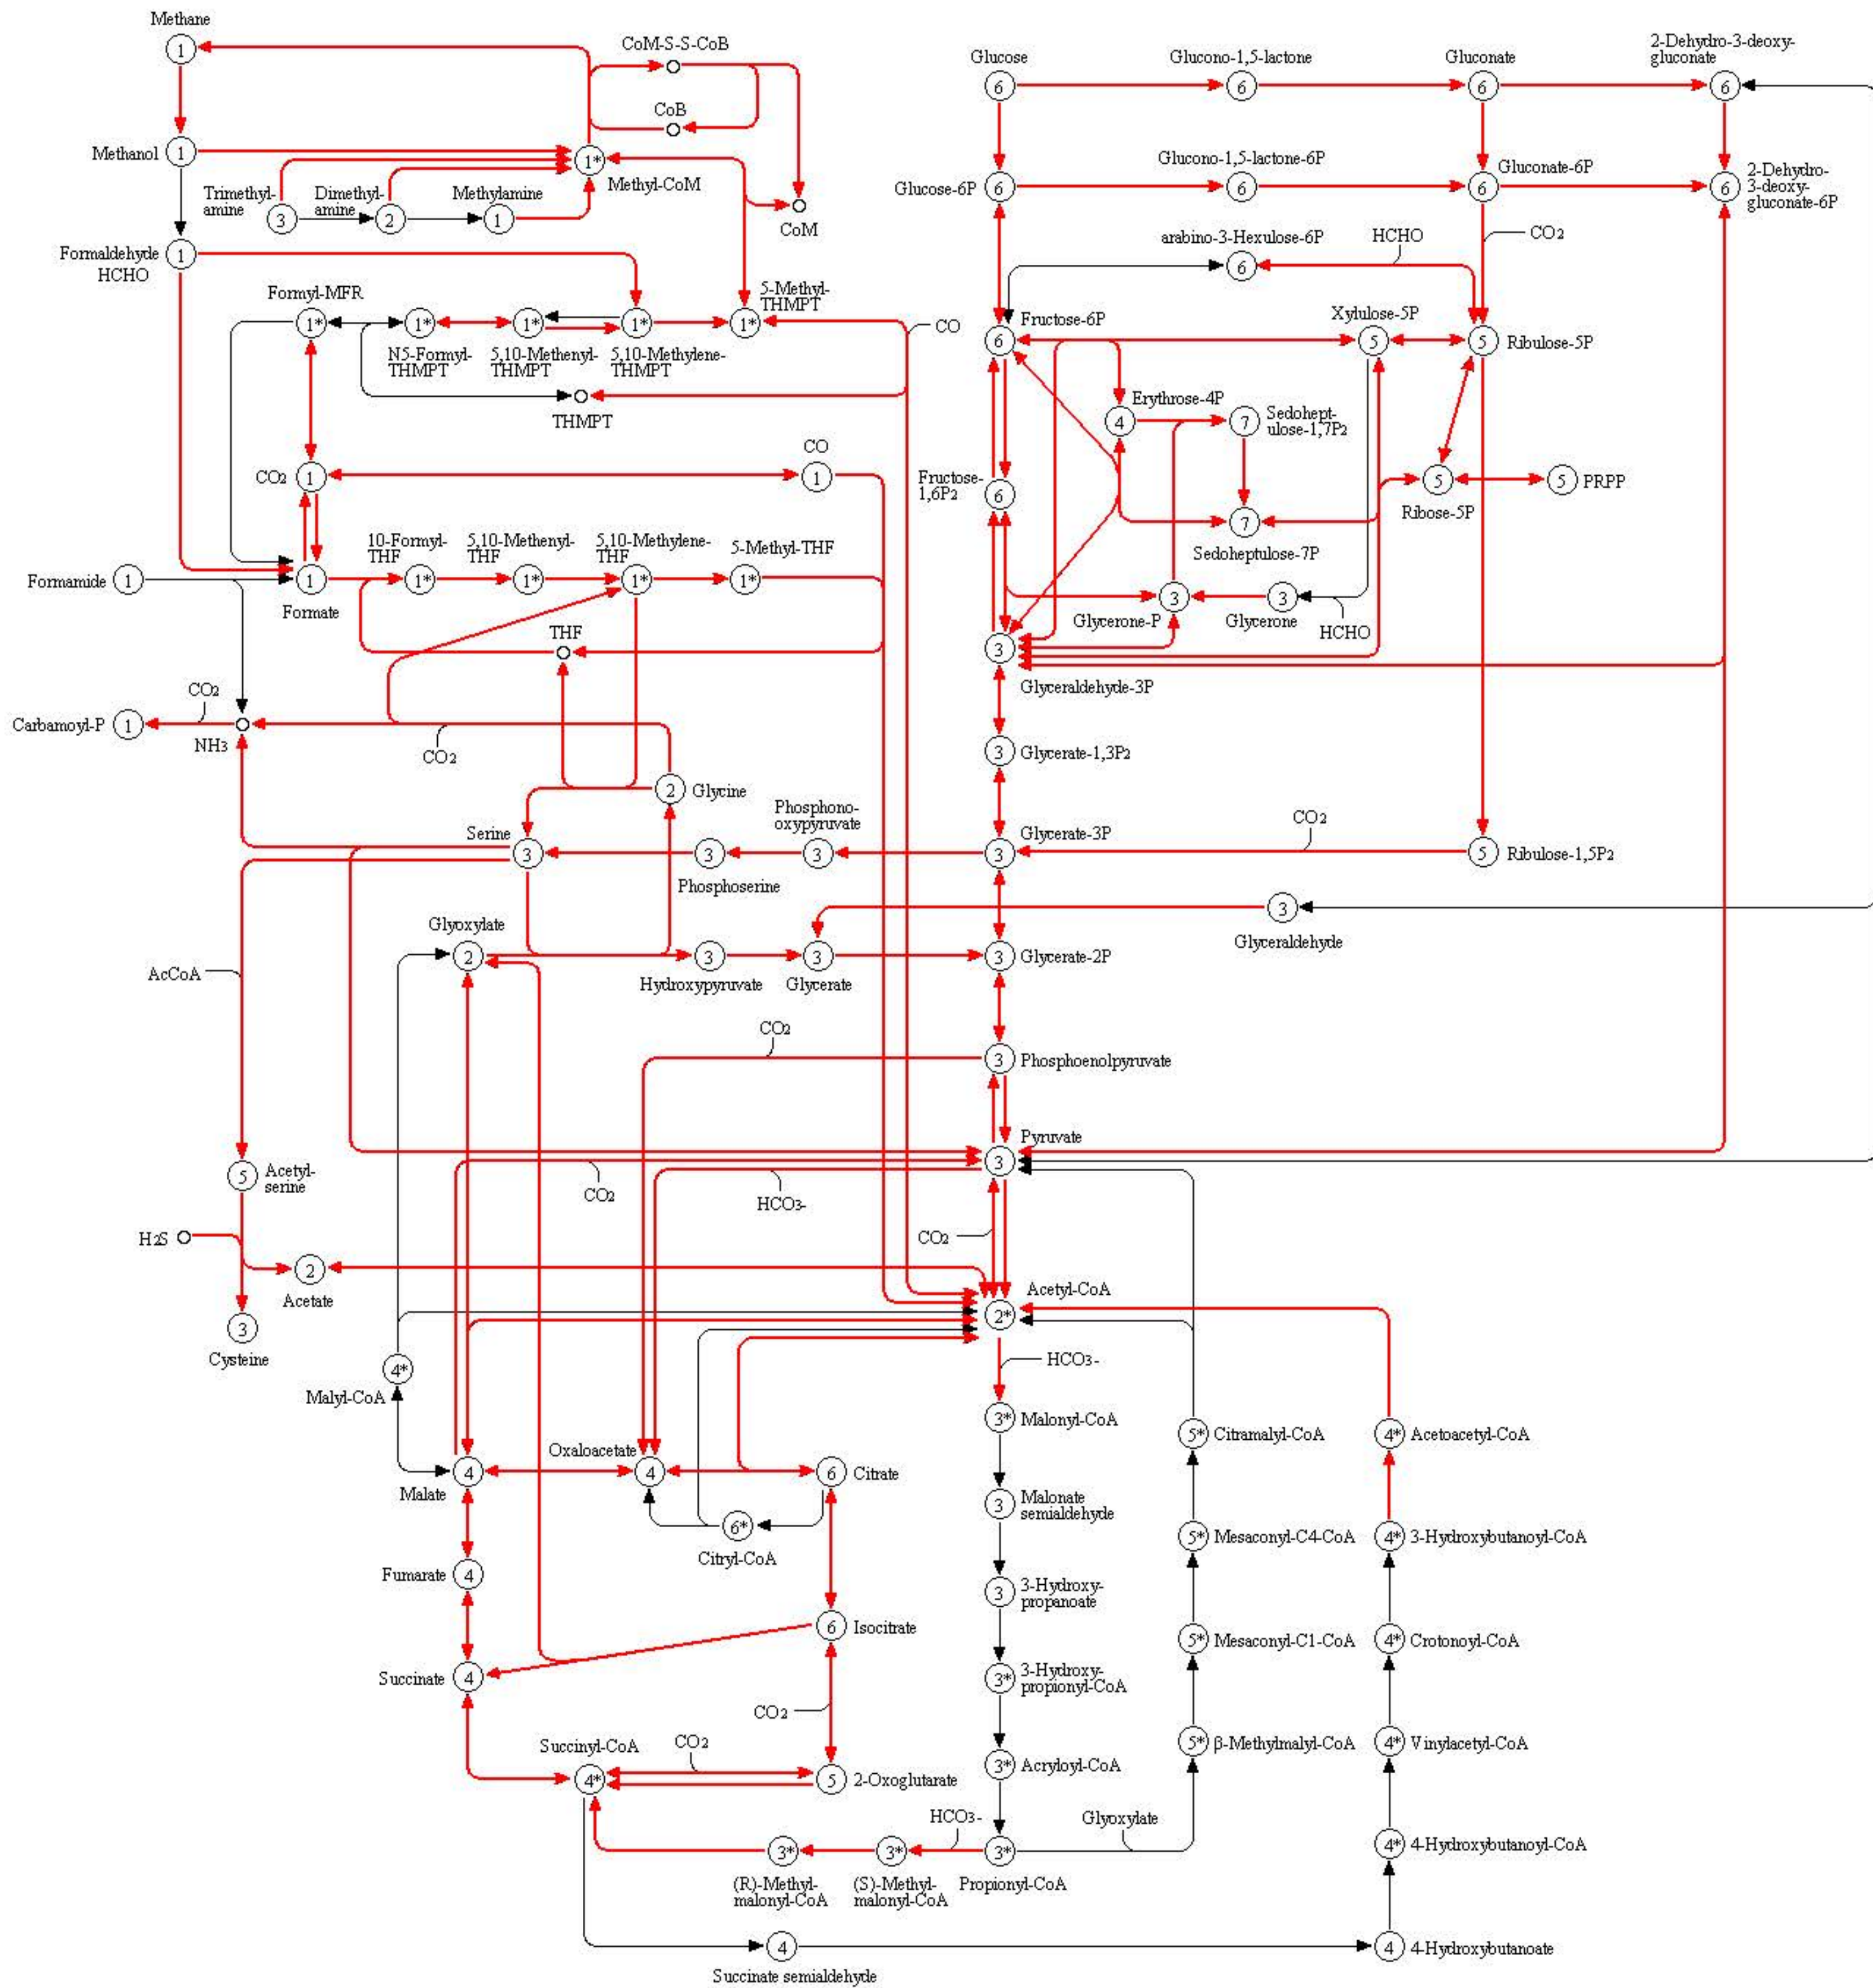

BIOSYNTHESIS OF AMINO ACIDS

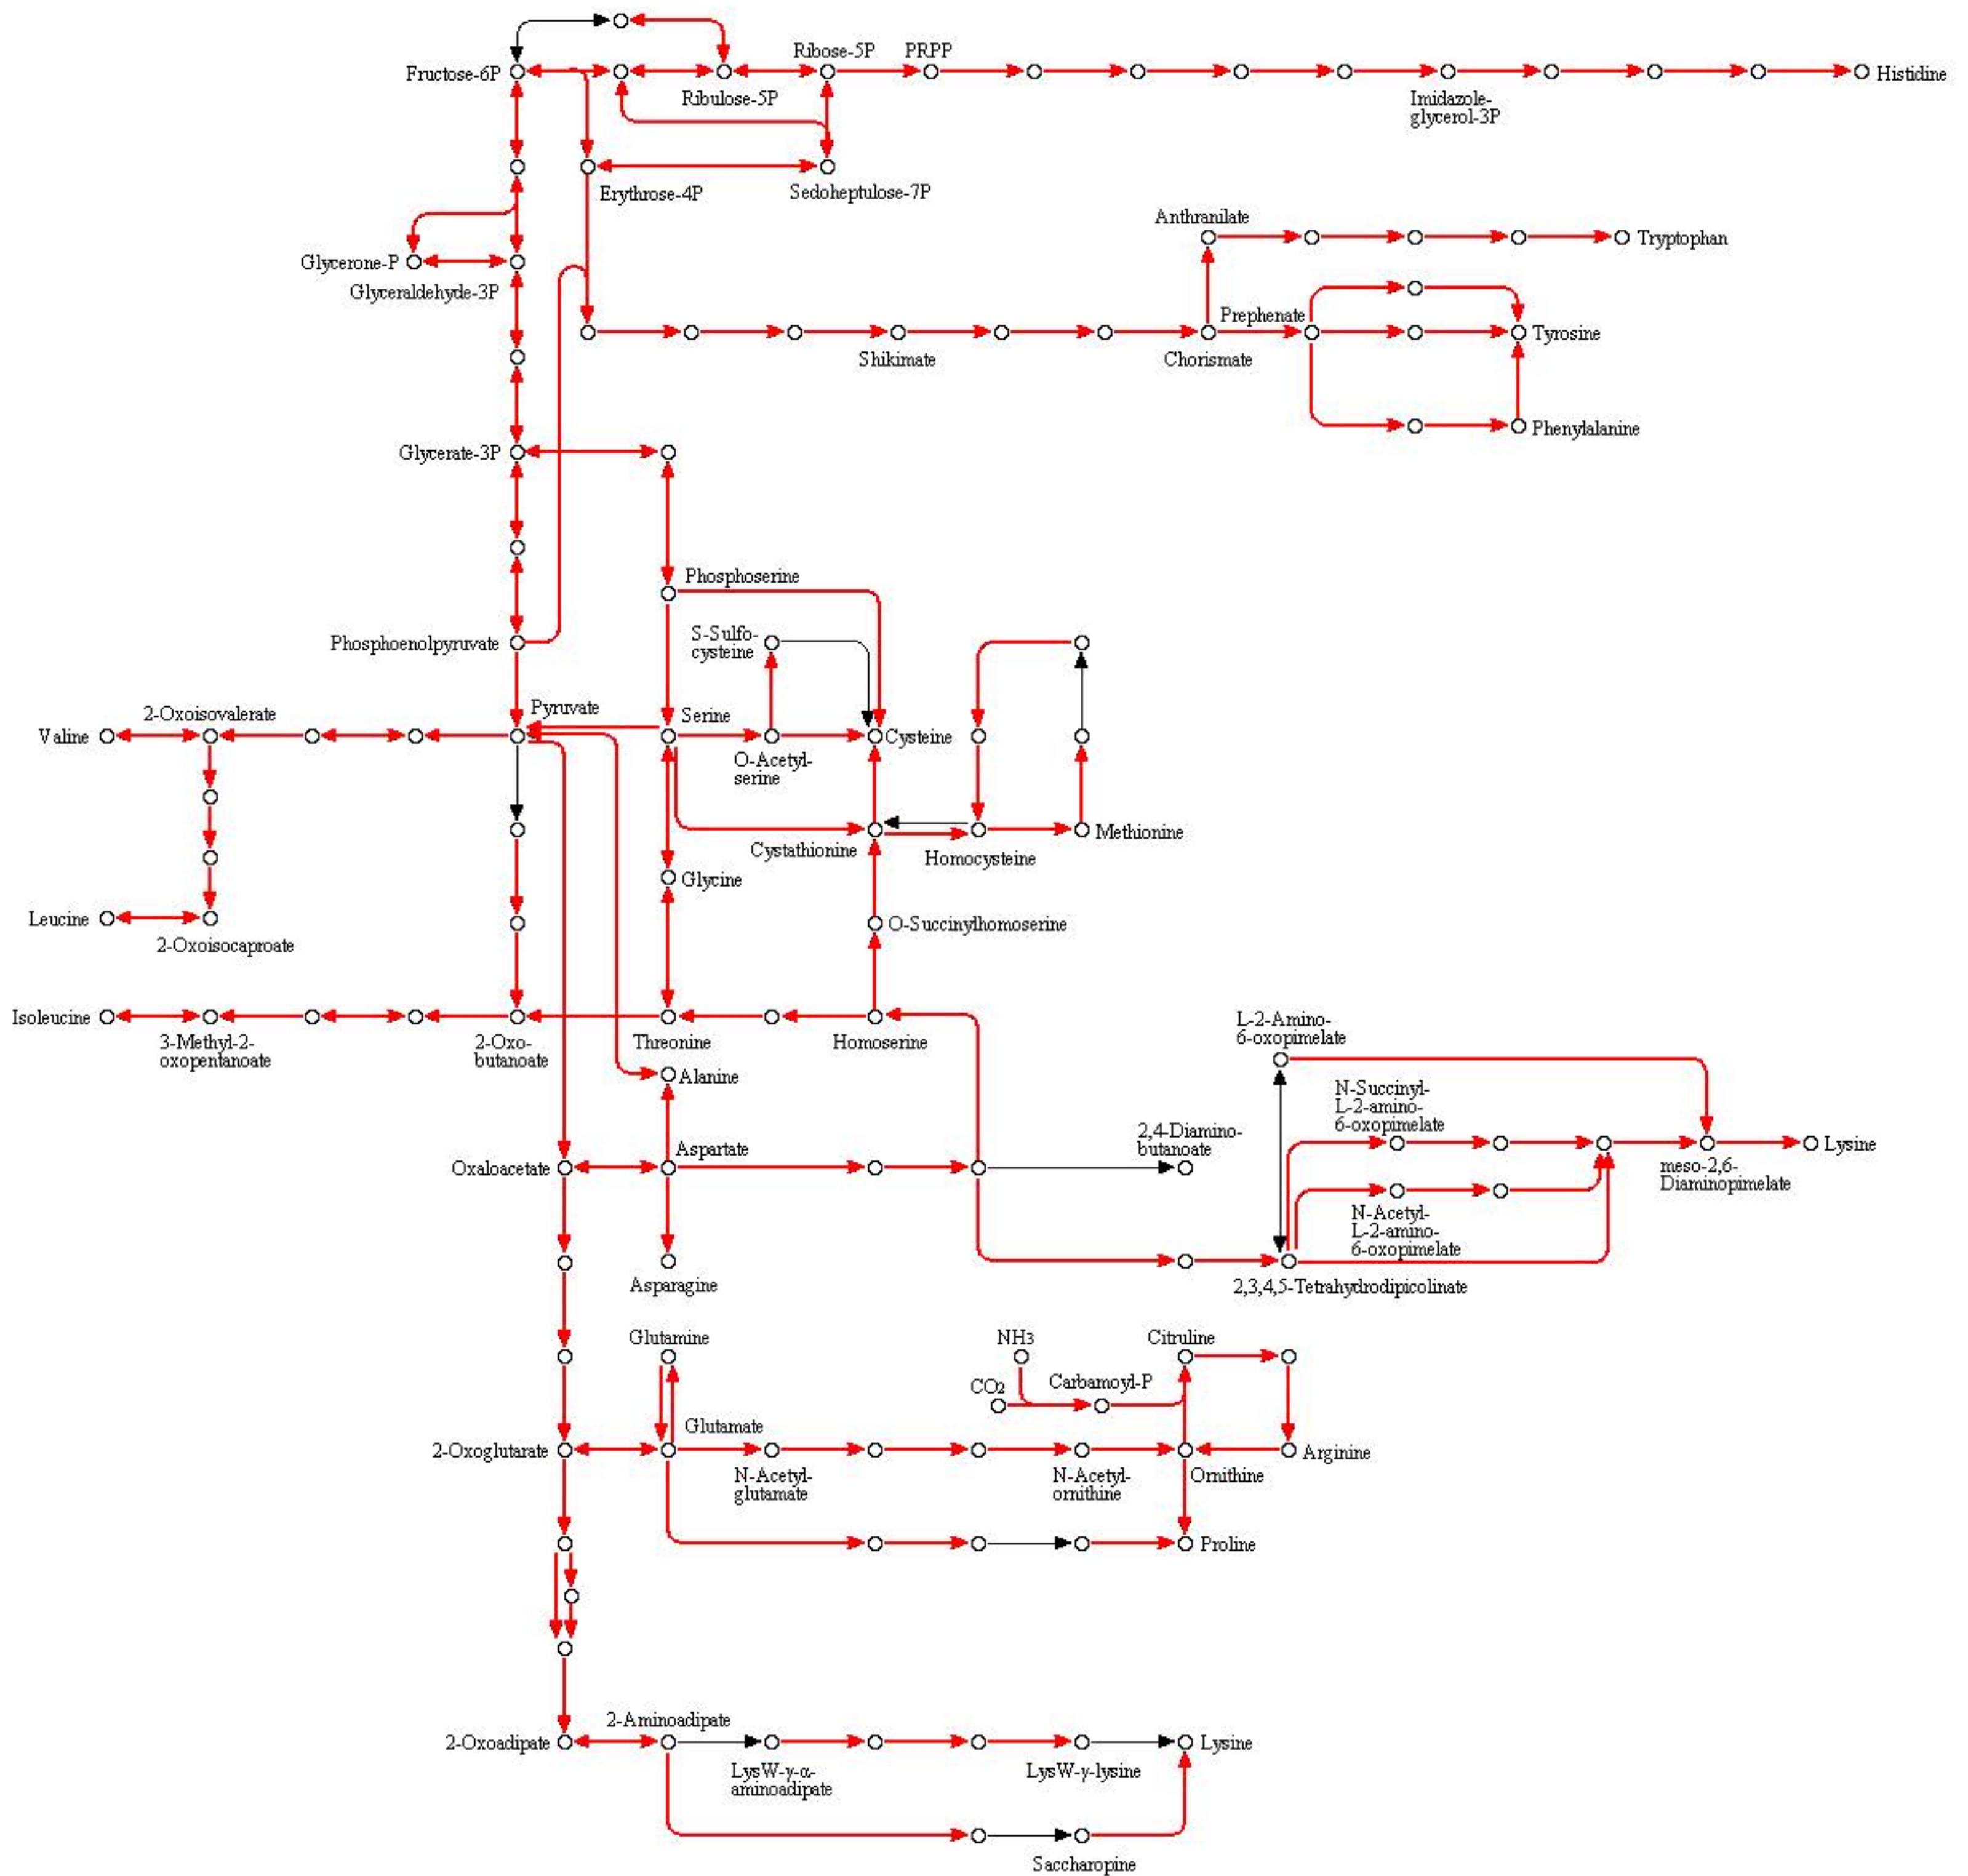

**FATTY ACID METABOLISM**

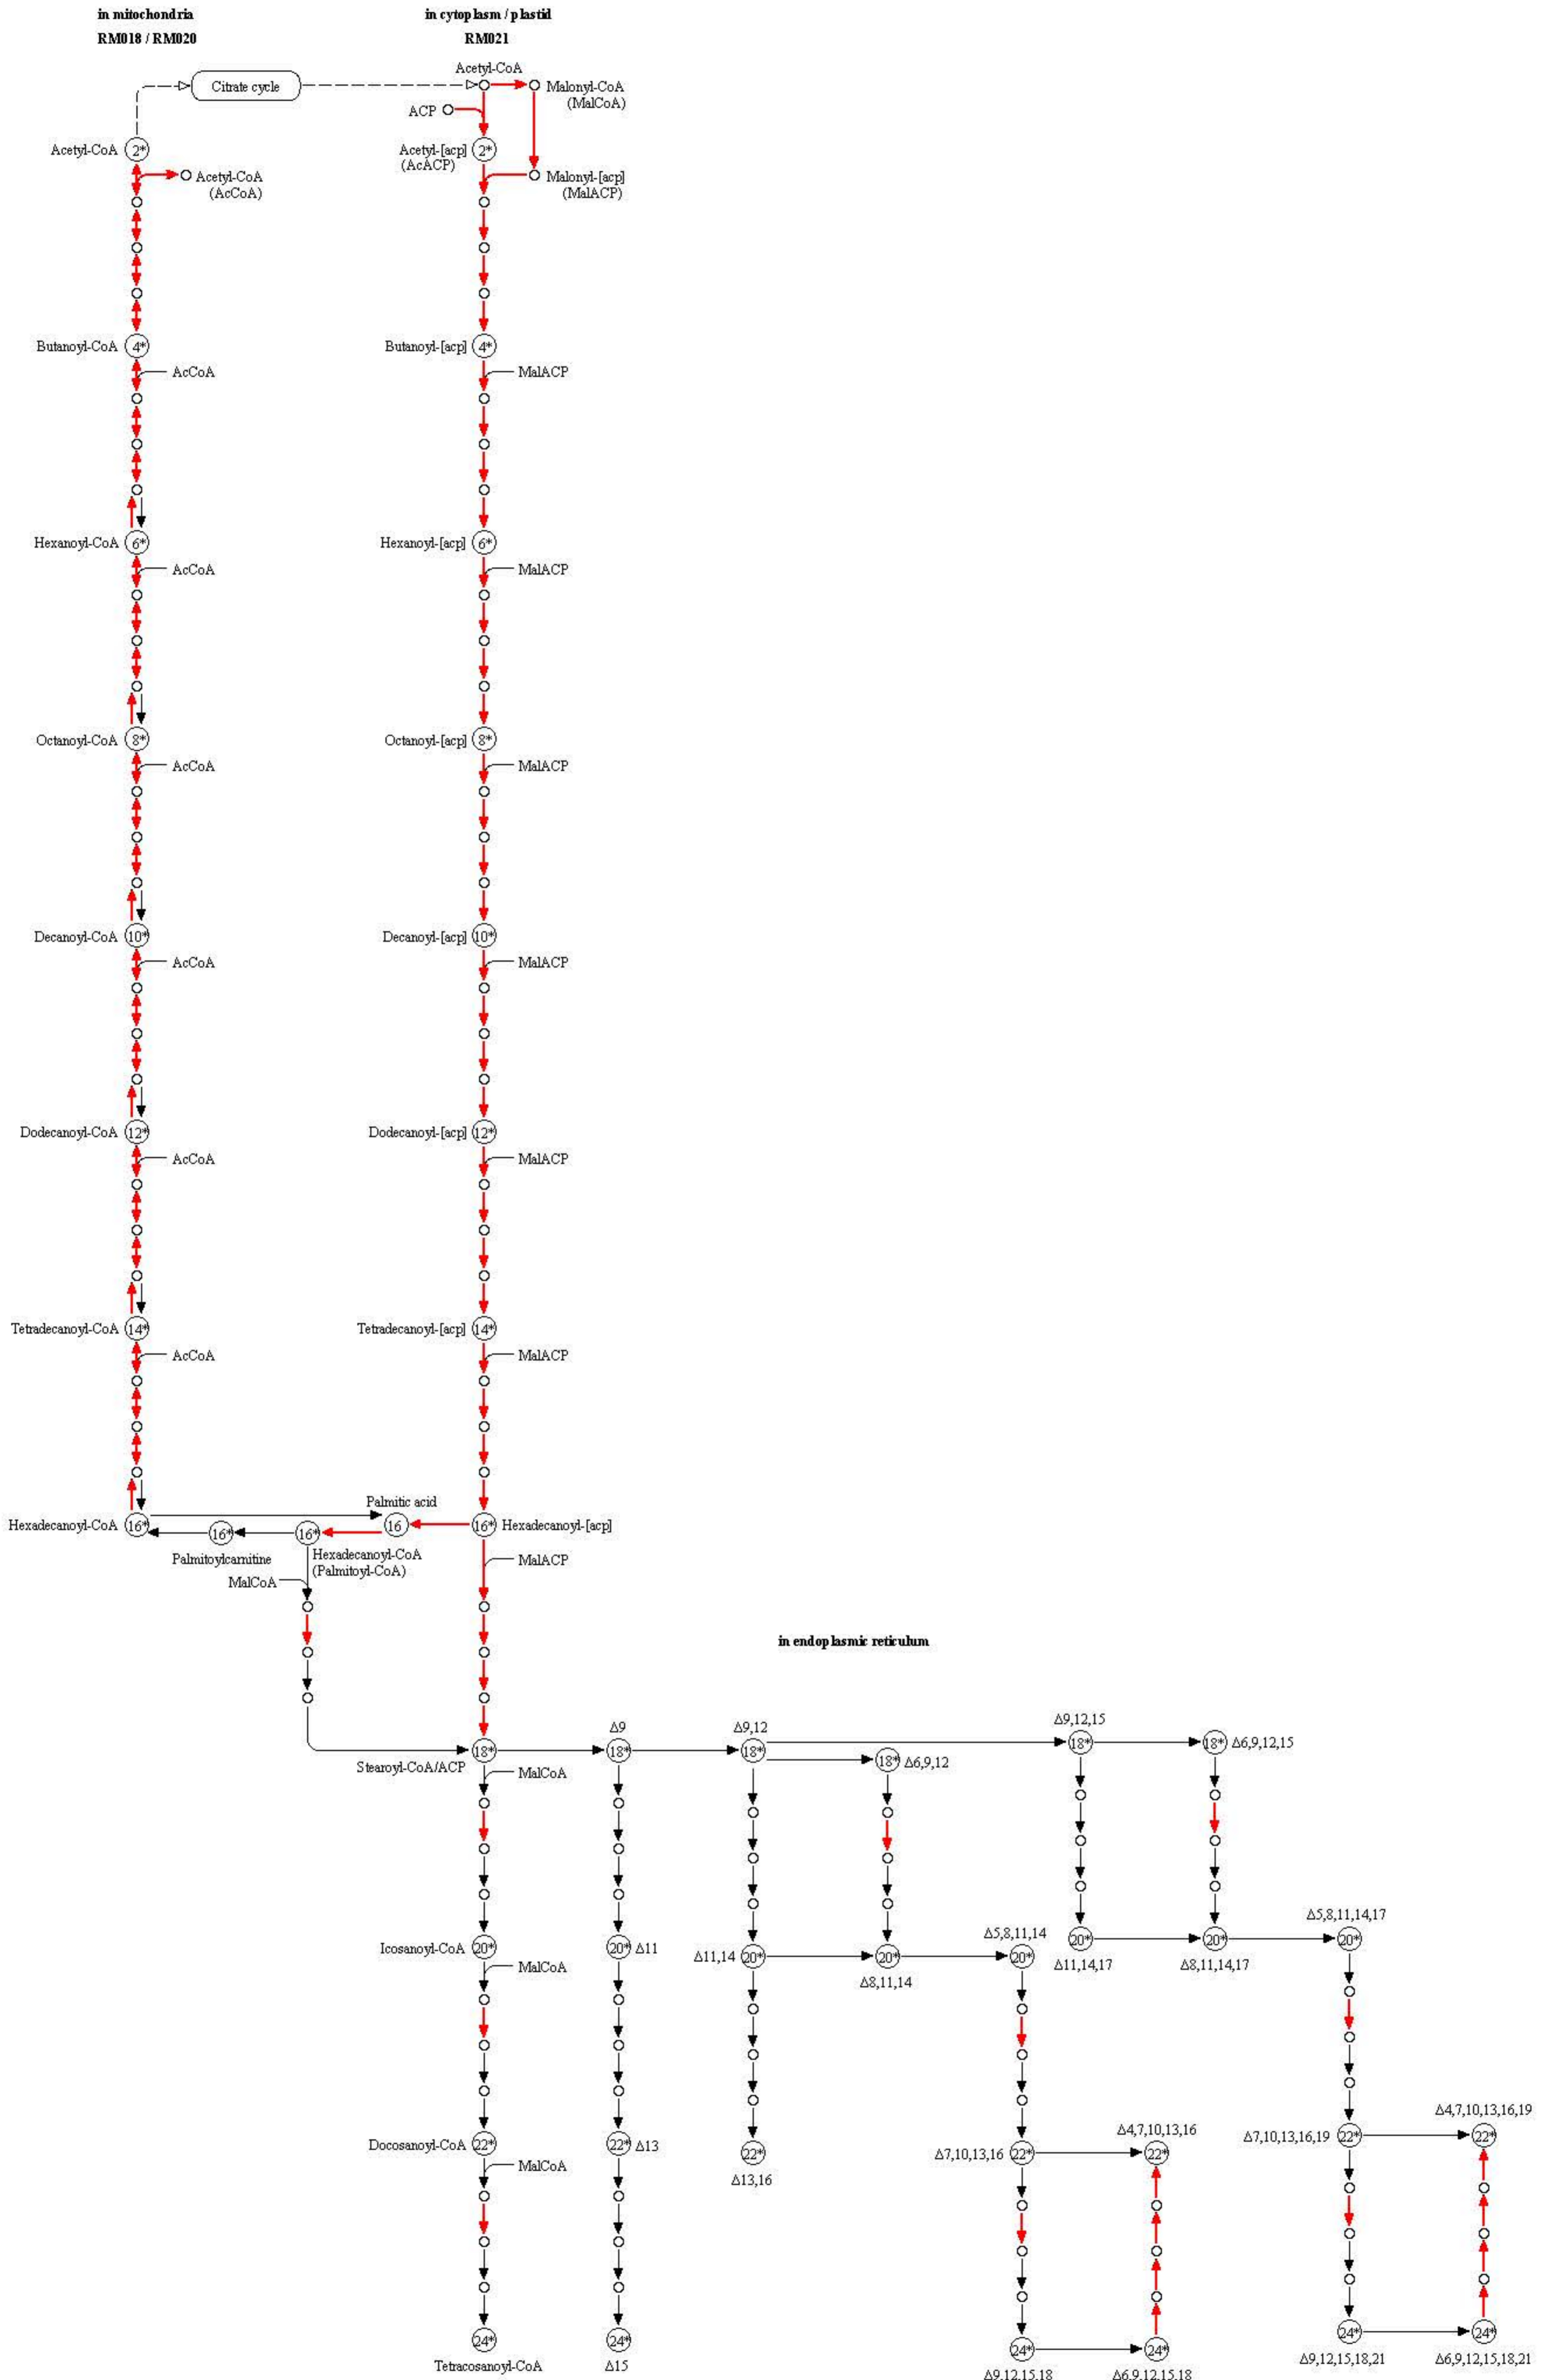

PURINE METABOLISM

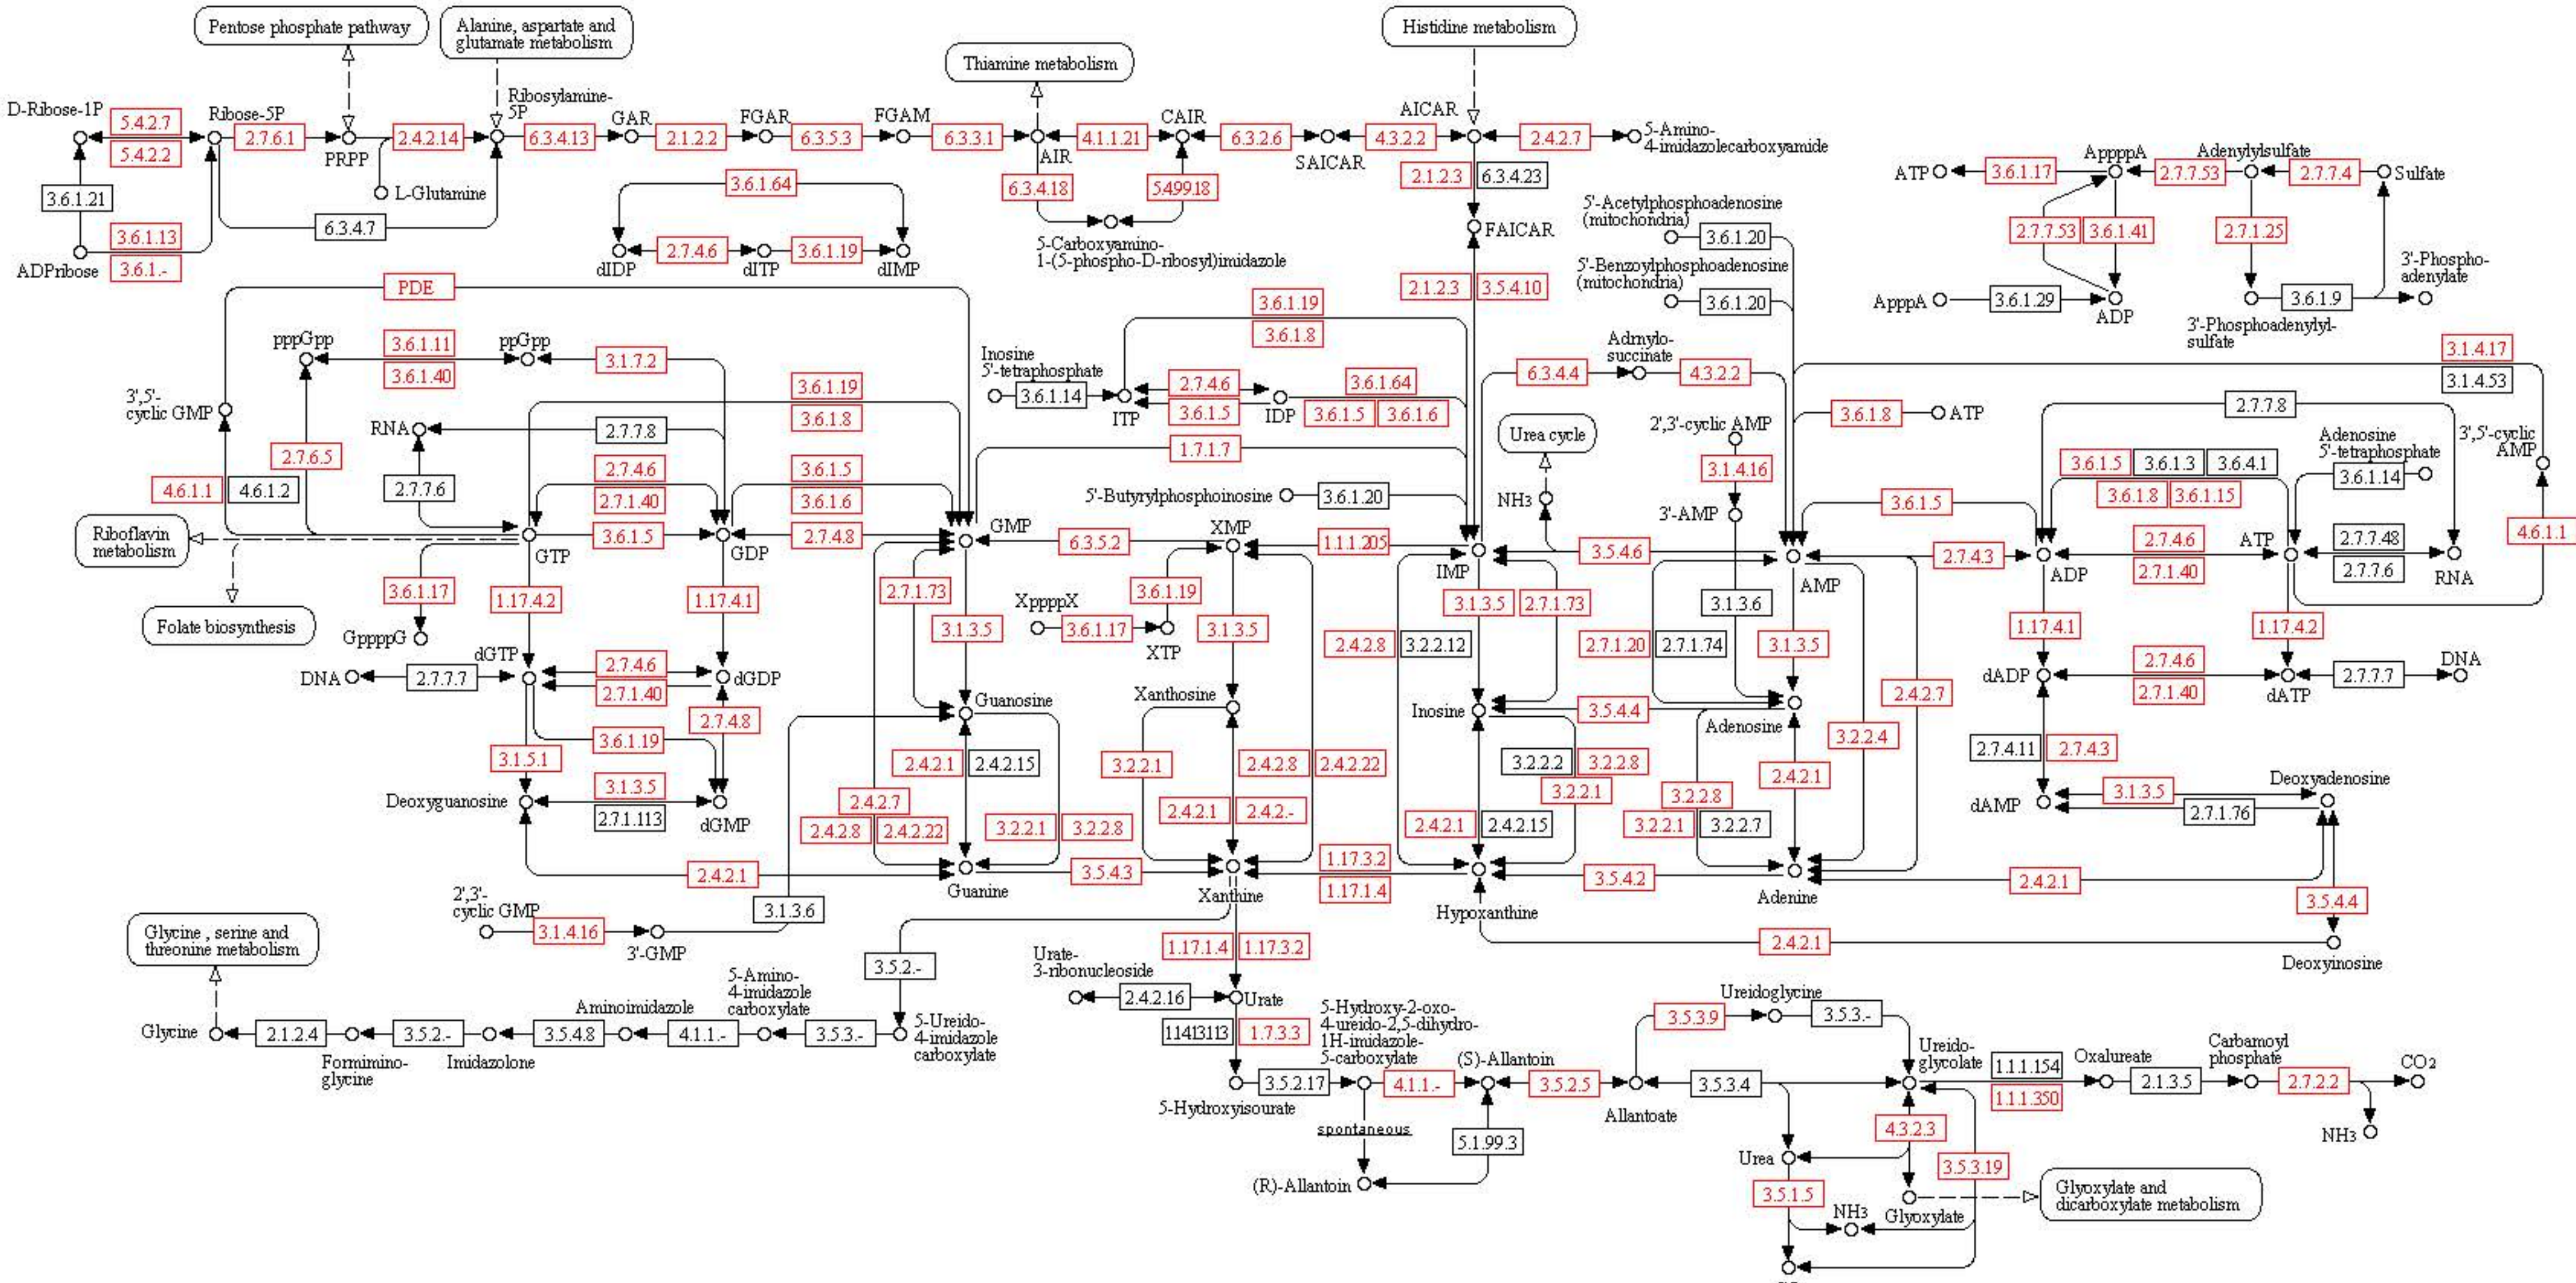

# PYRIMIDINE METABOLISM

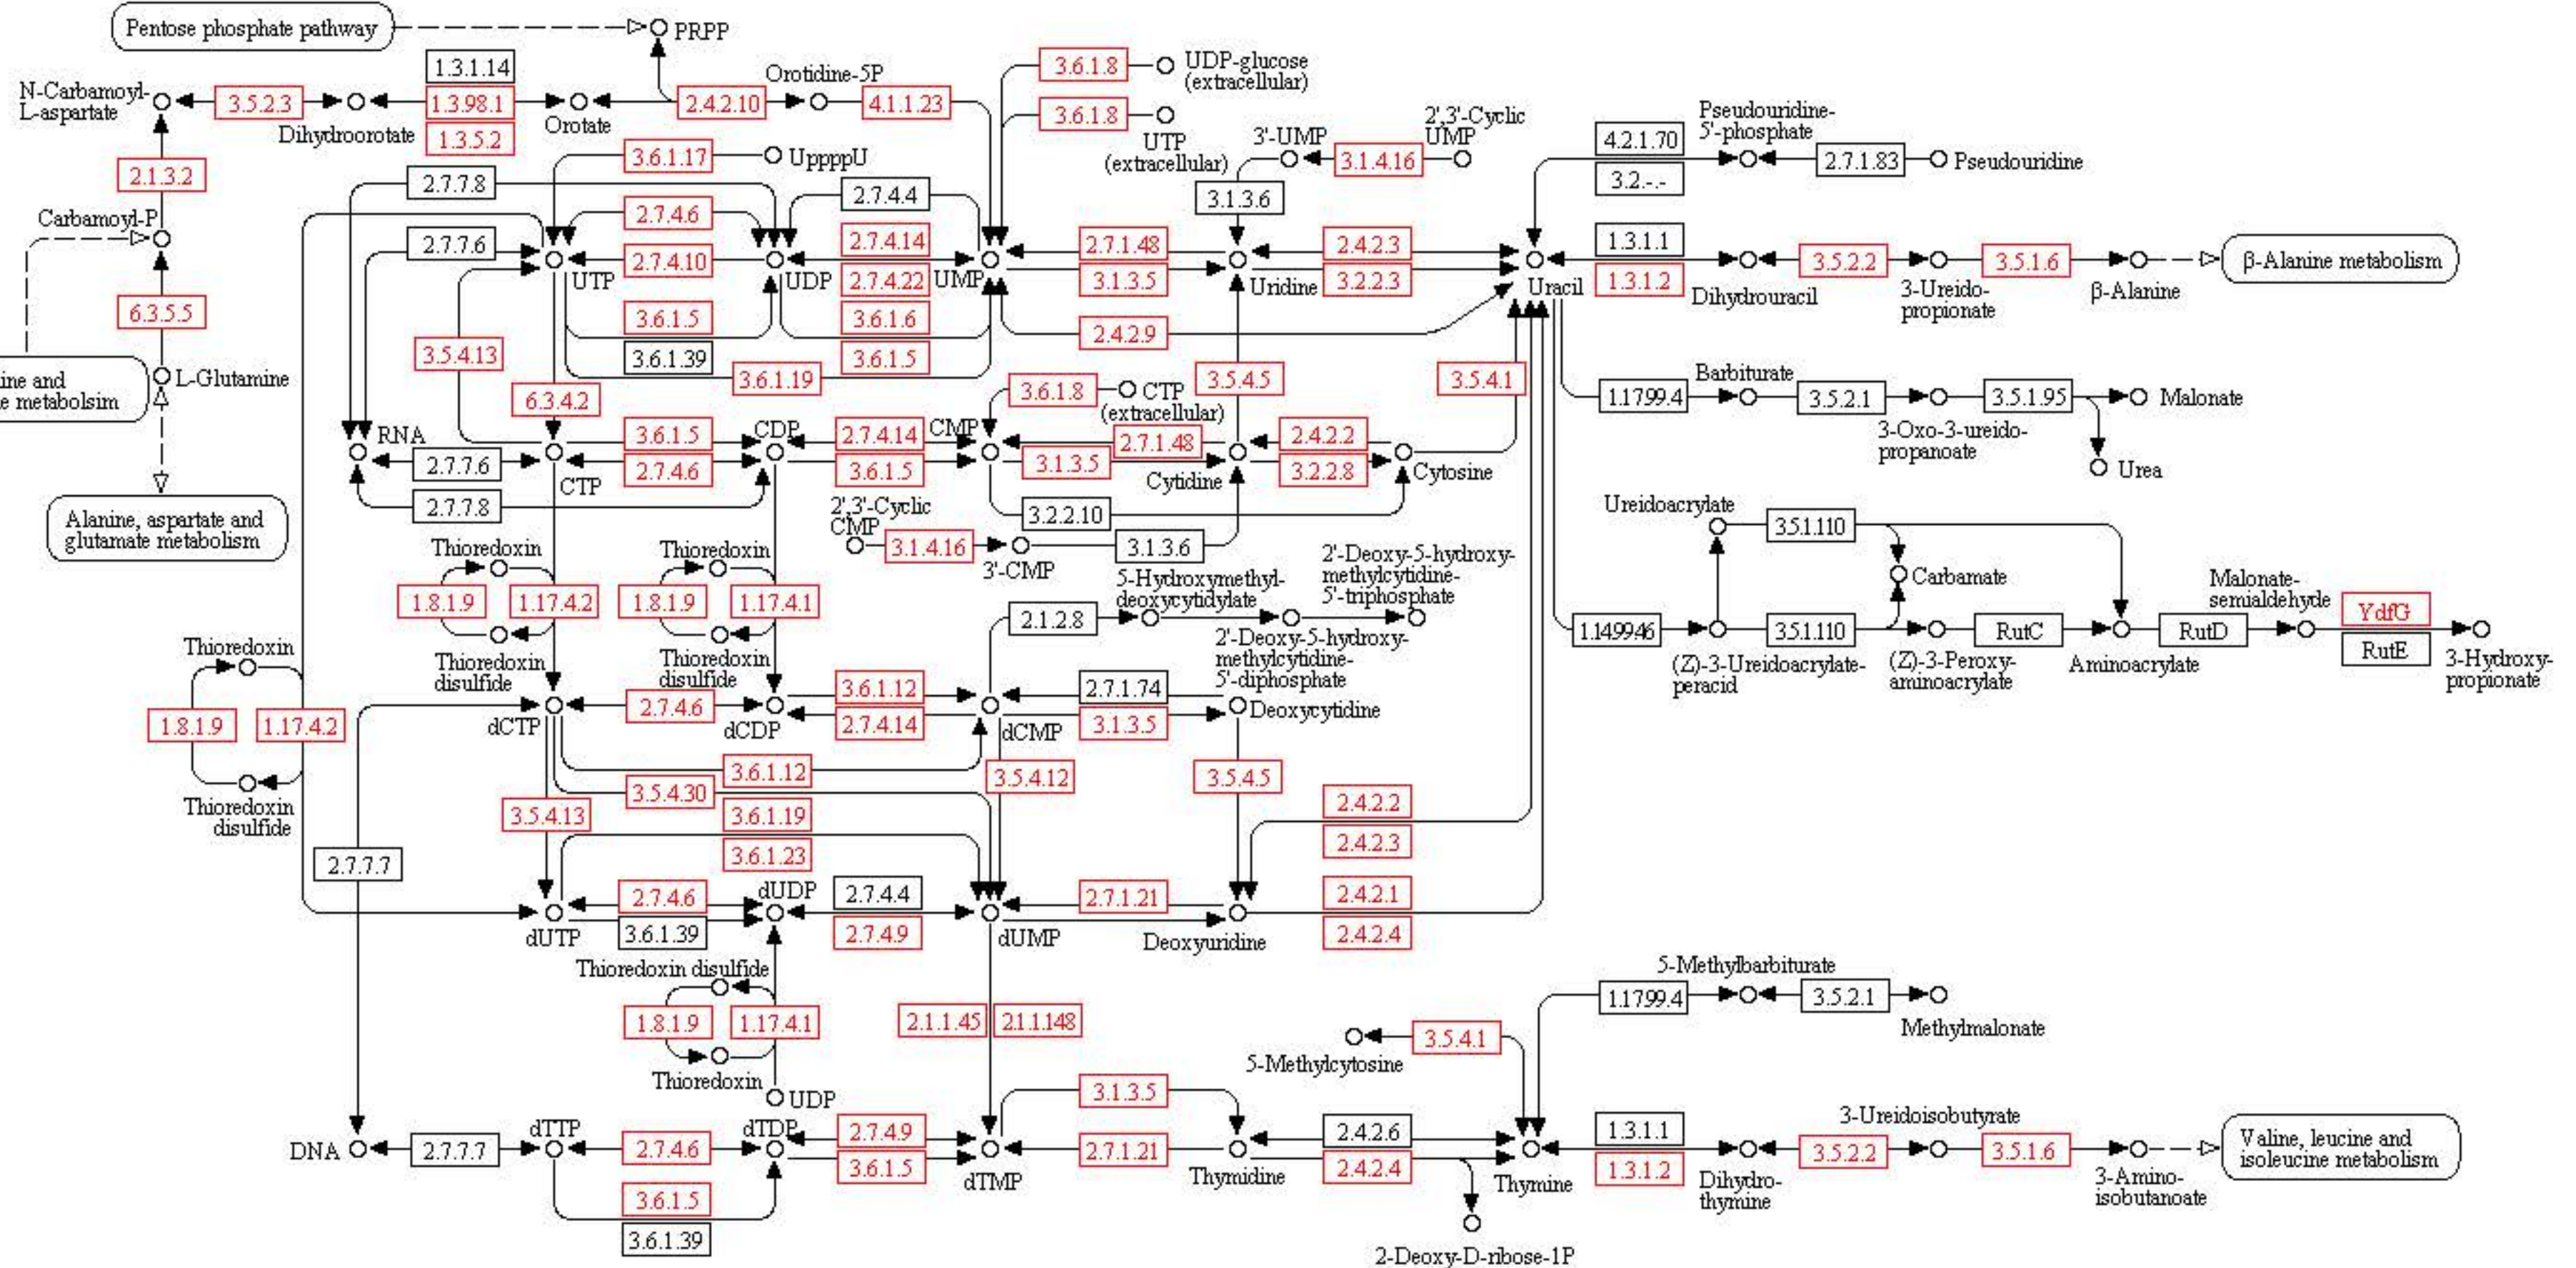

# THIAMINE METABOLISM

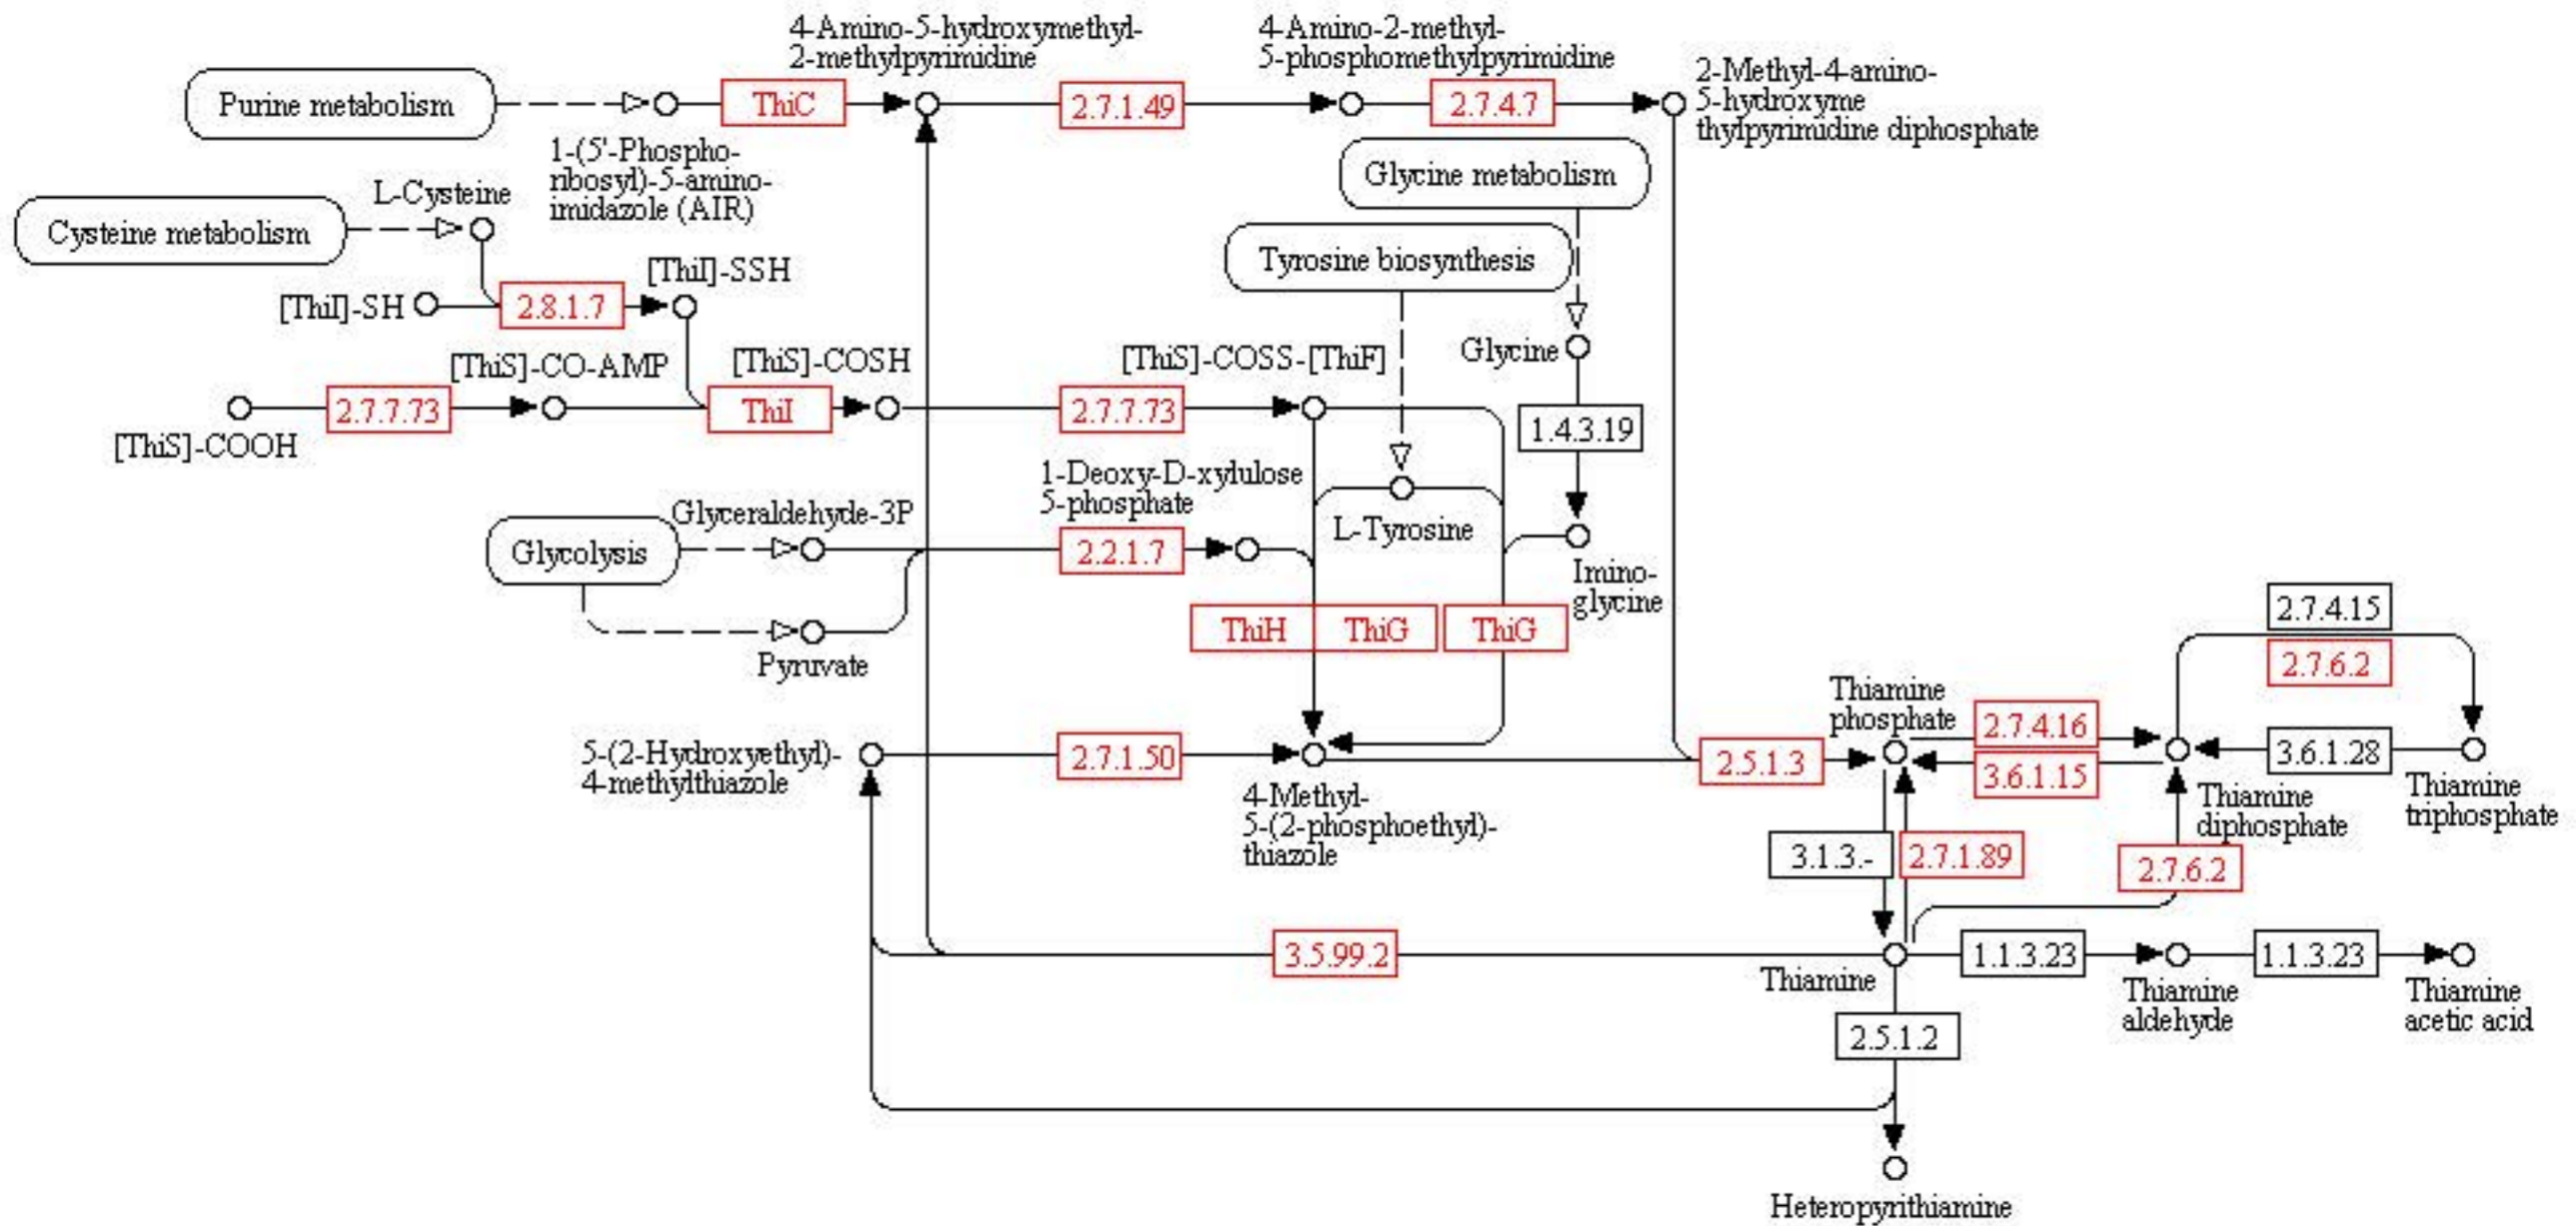

# RIBOFLAVIN METABOLISM

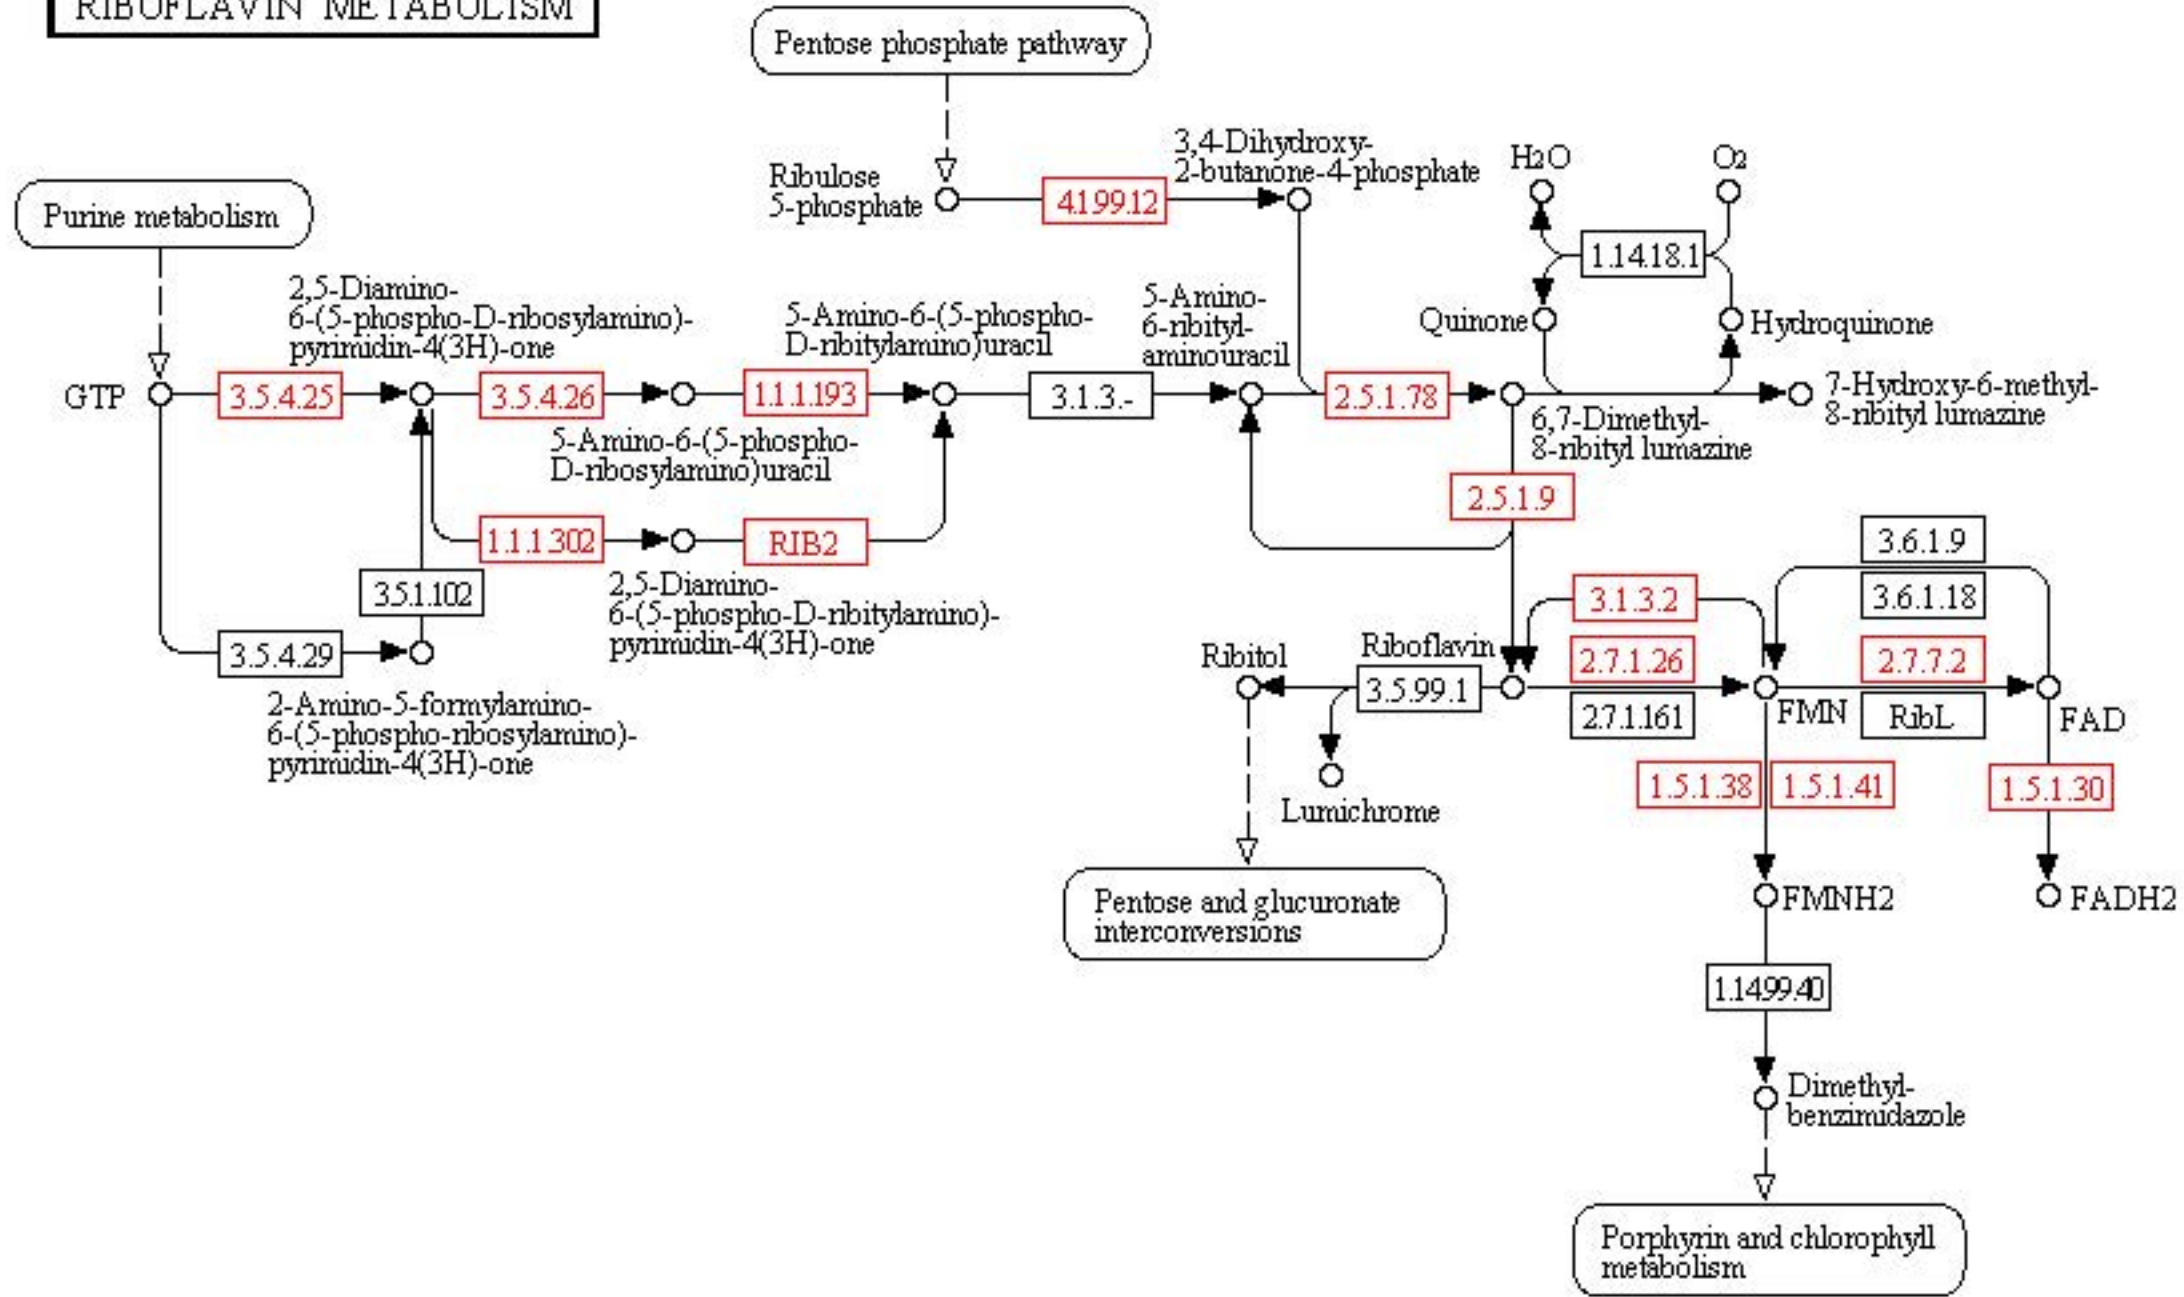

# VITAMINE B6 METABOLISM

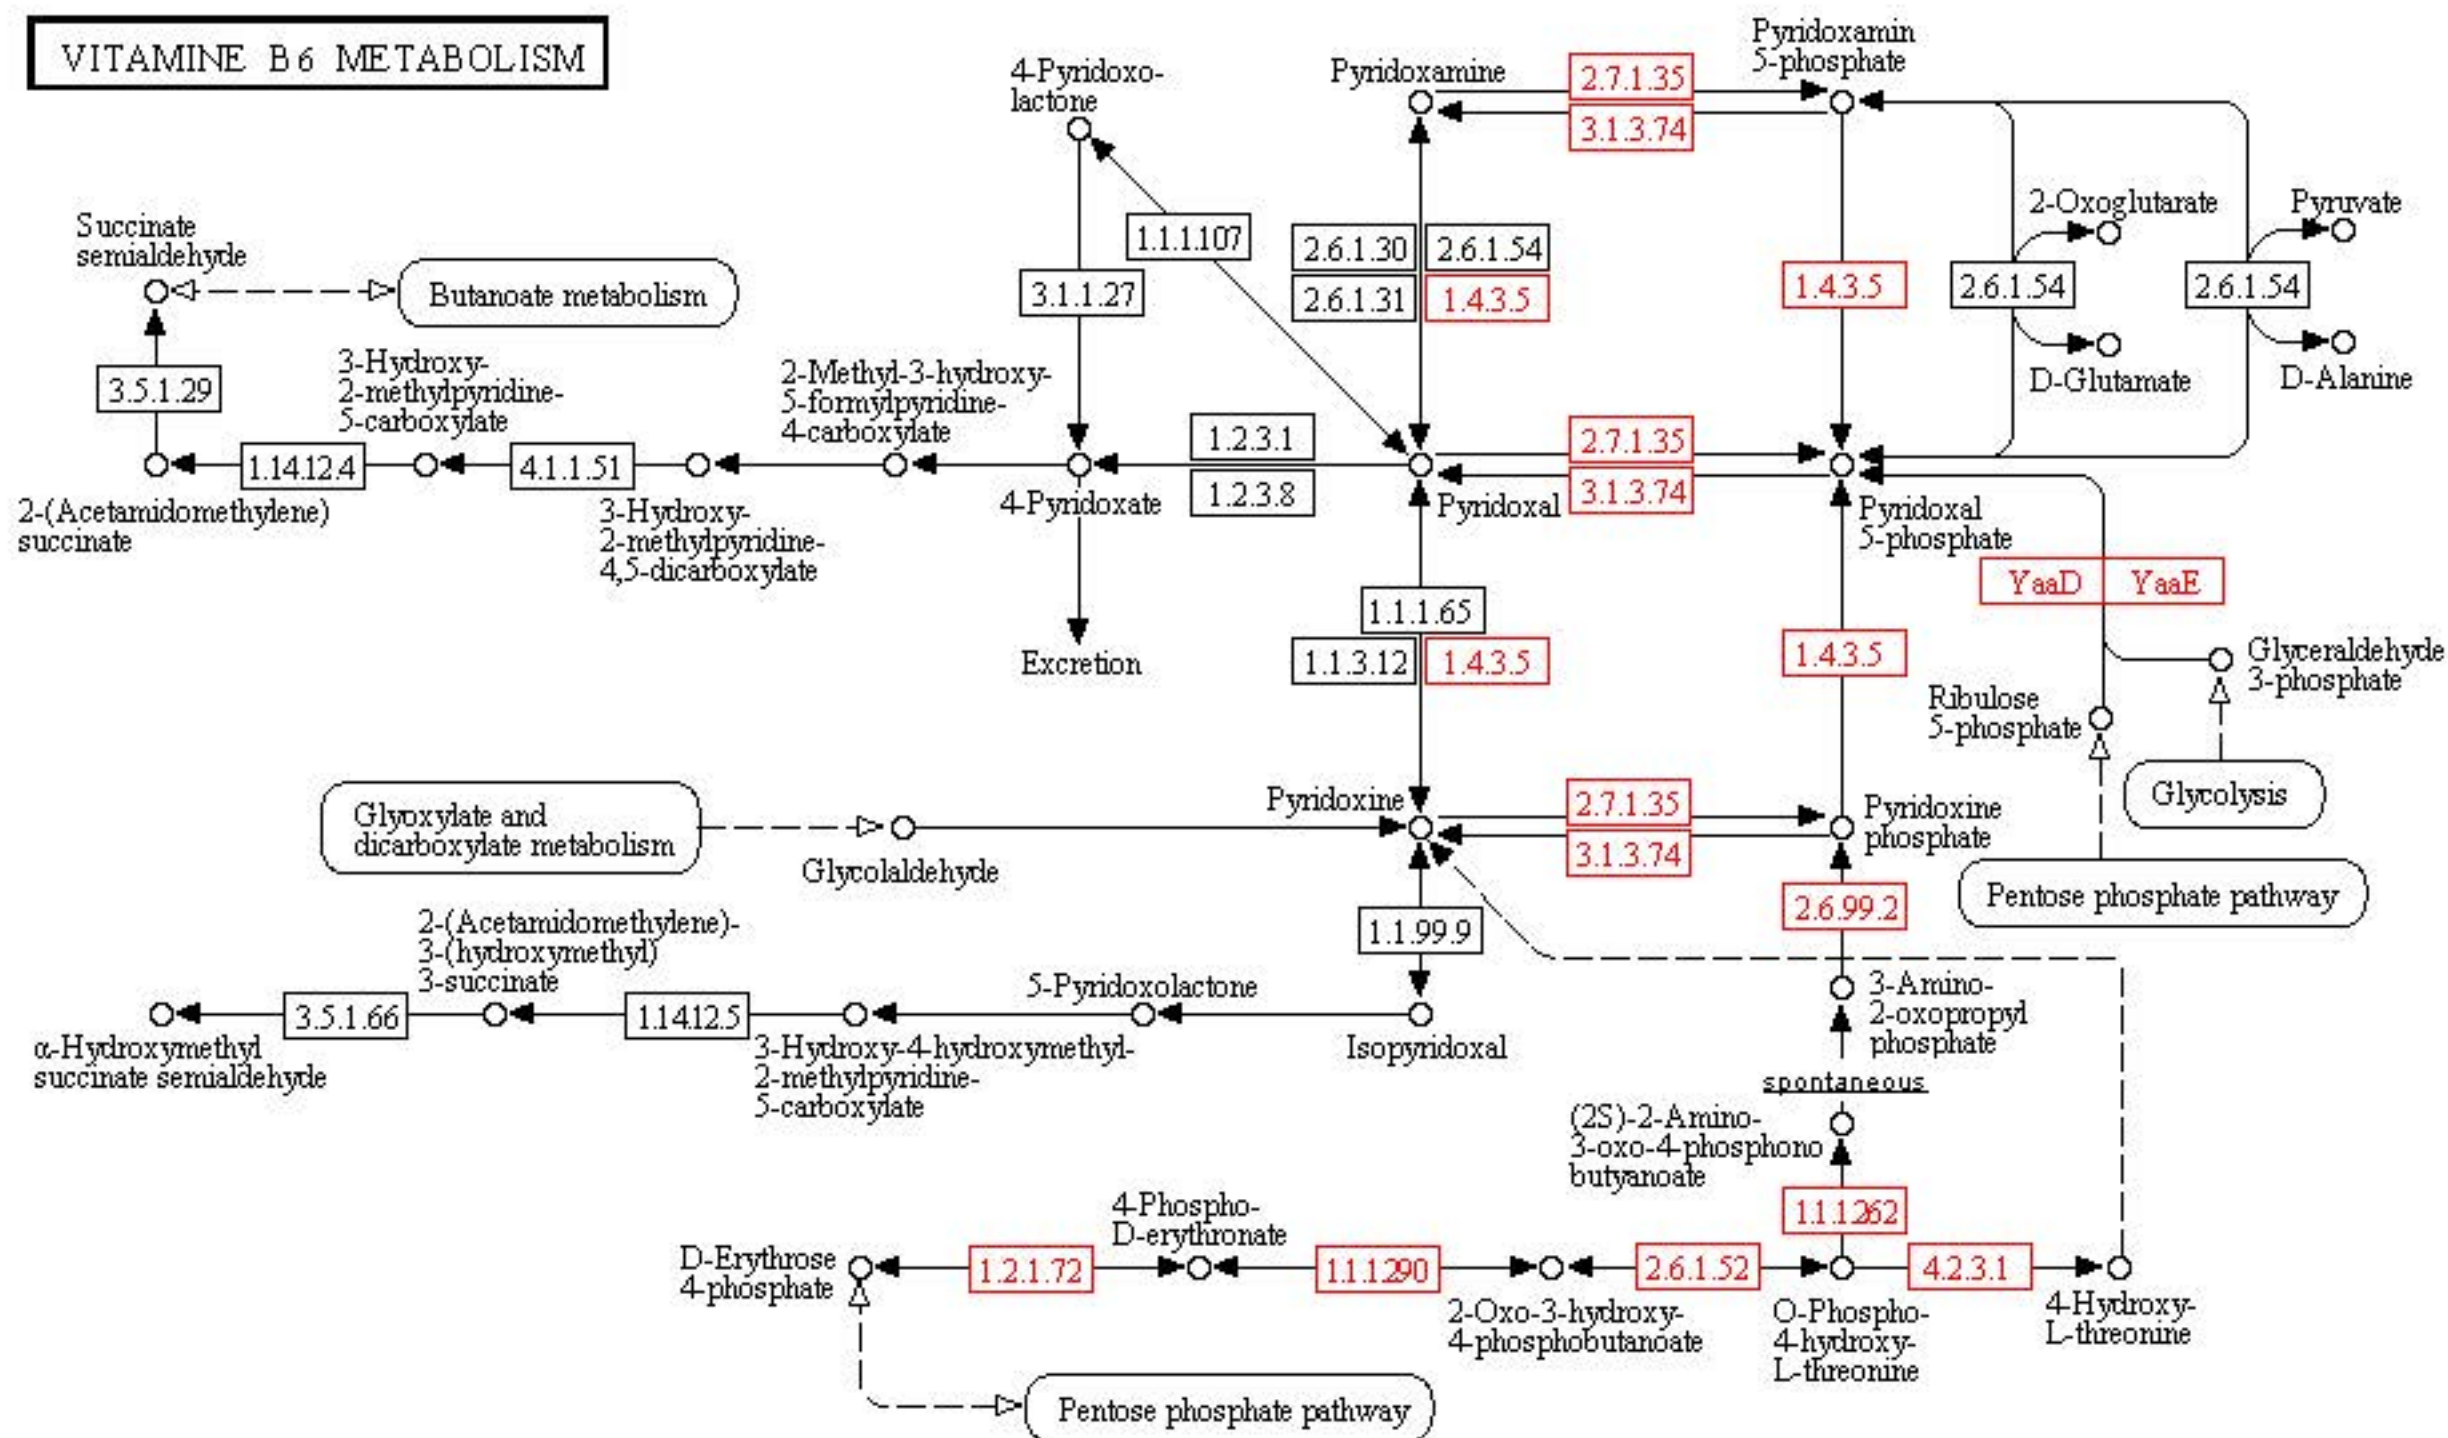



NICOTINATE AND NICOTINAMIDE METABOLISM

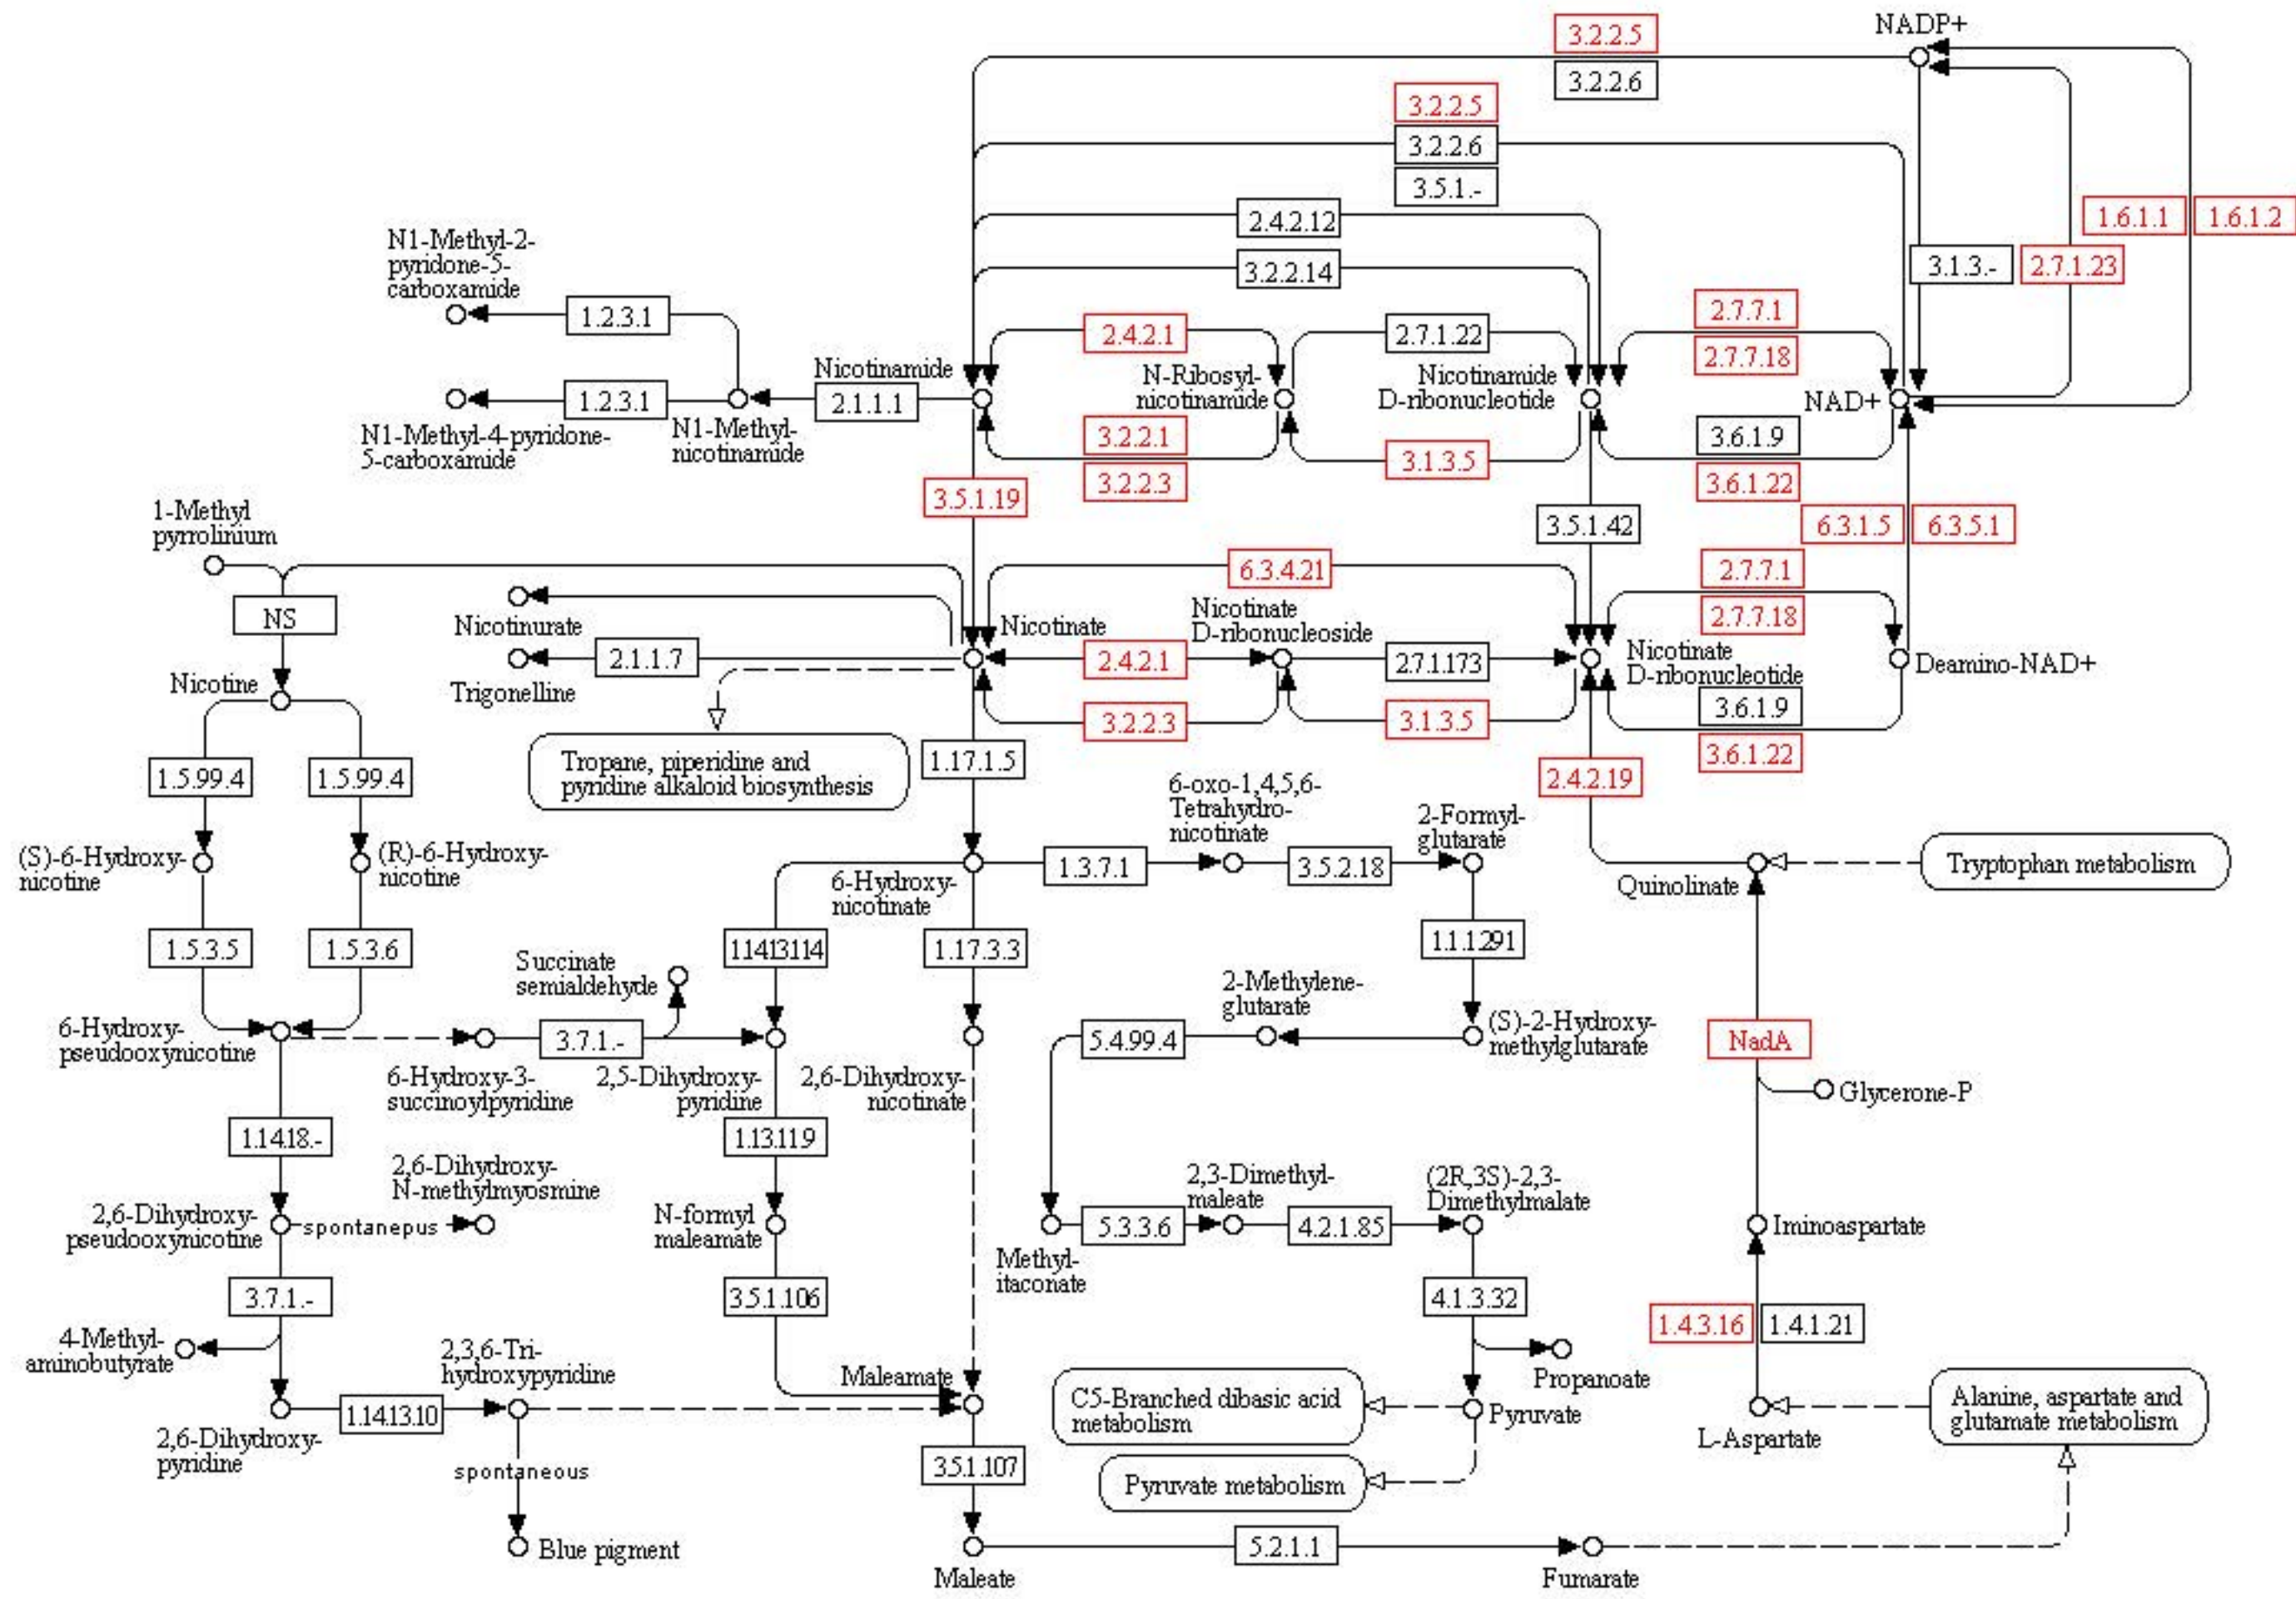

# PANTOTHENATE AND CoA BIOSYNTHESIS

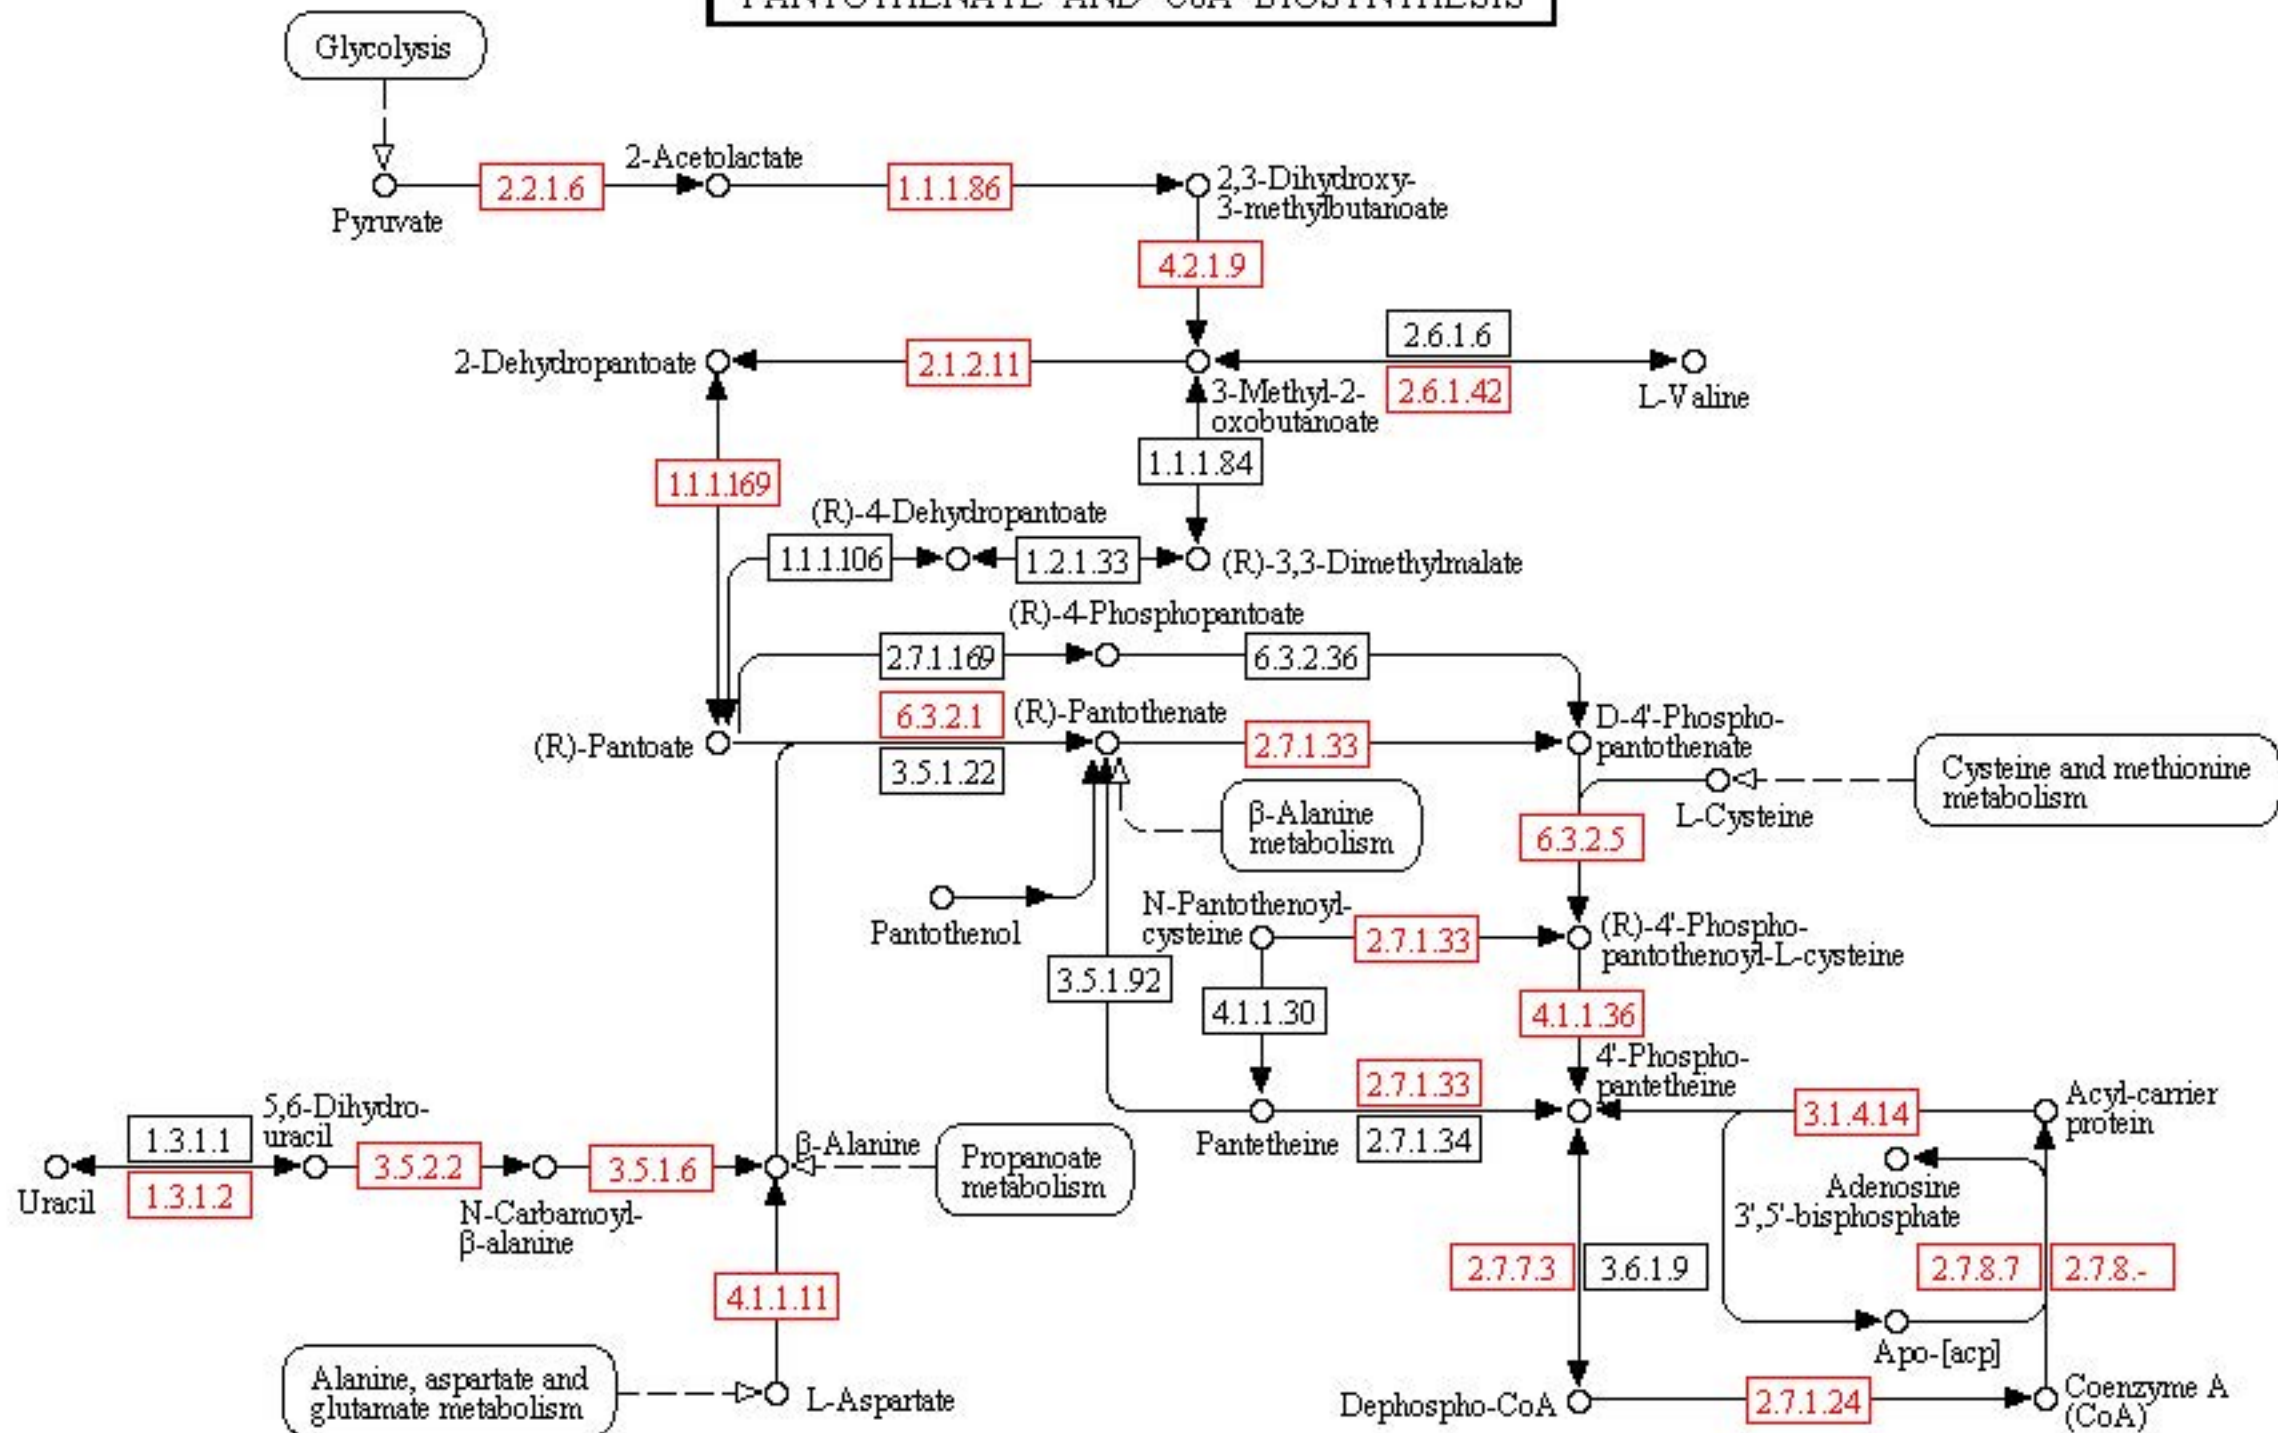

# BIOTIN METABOLISM

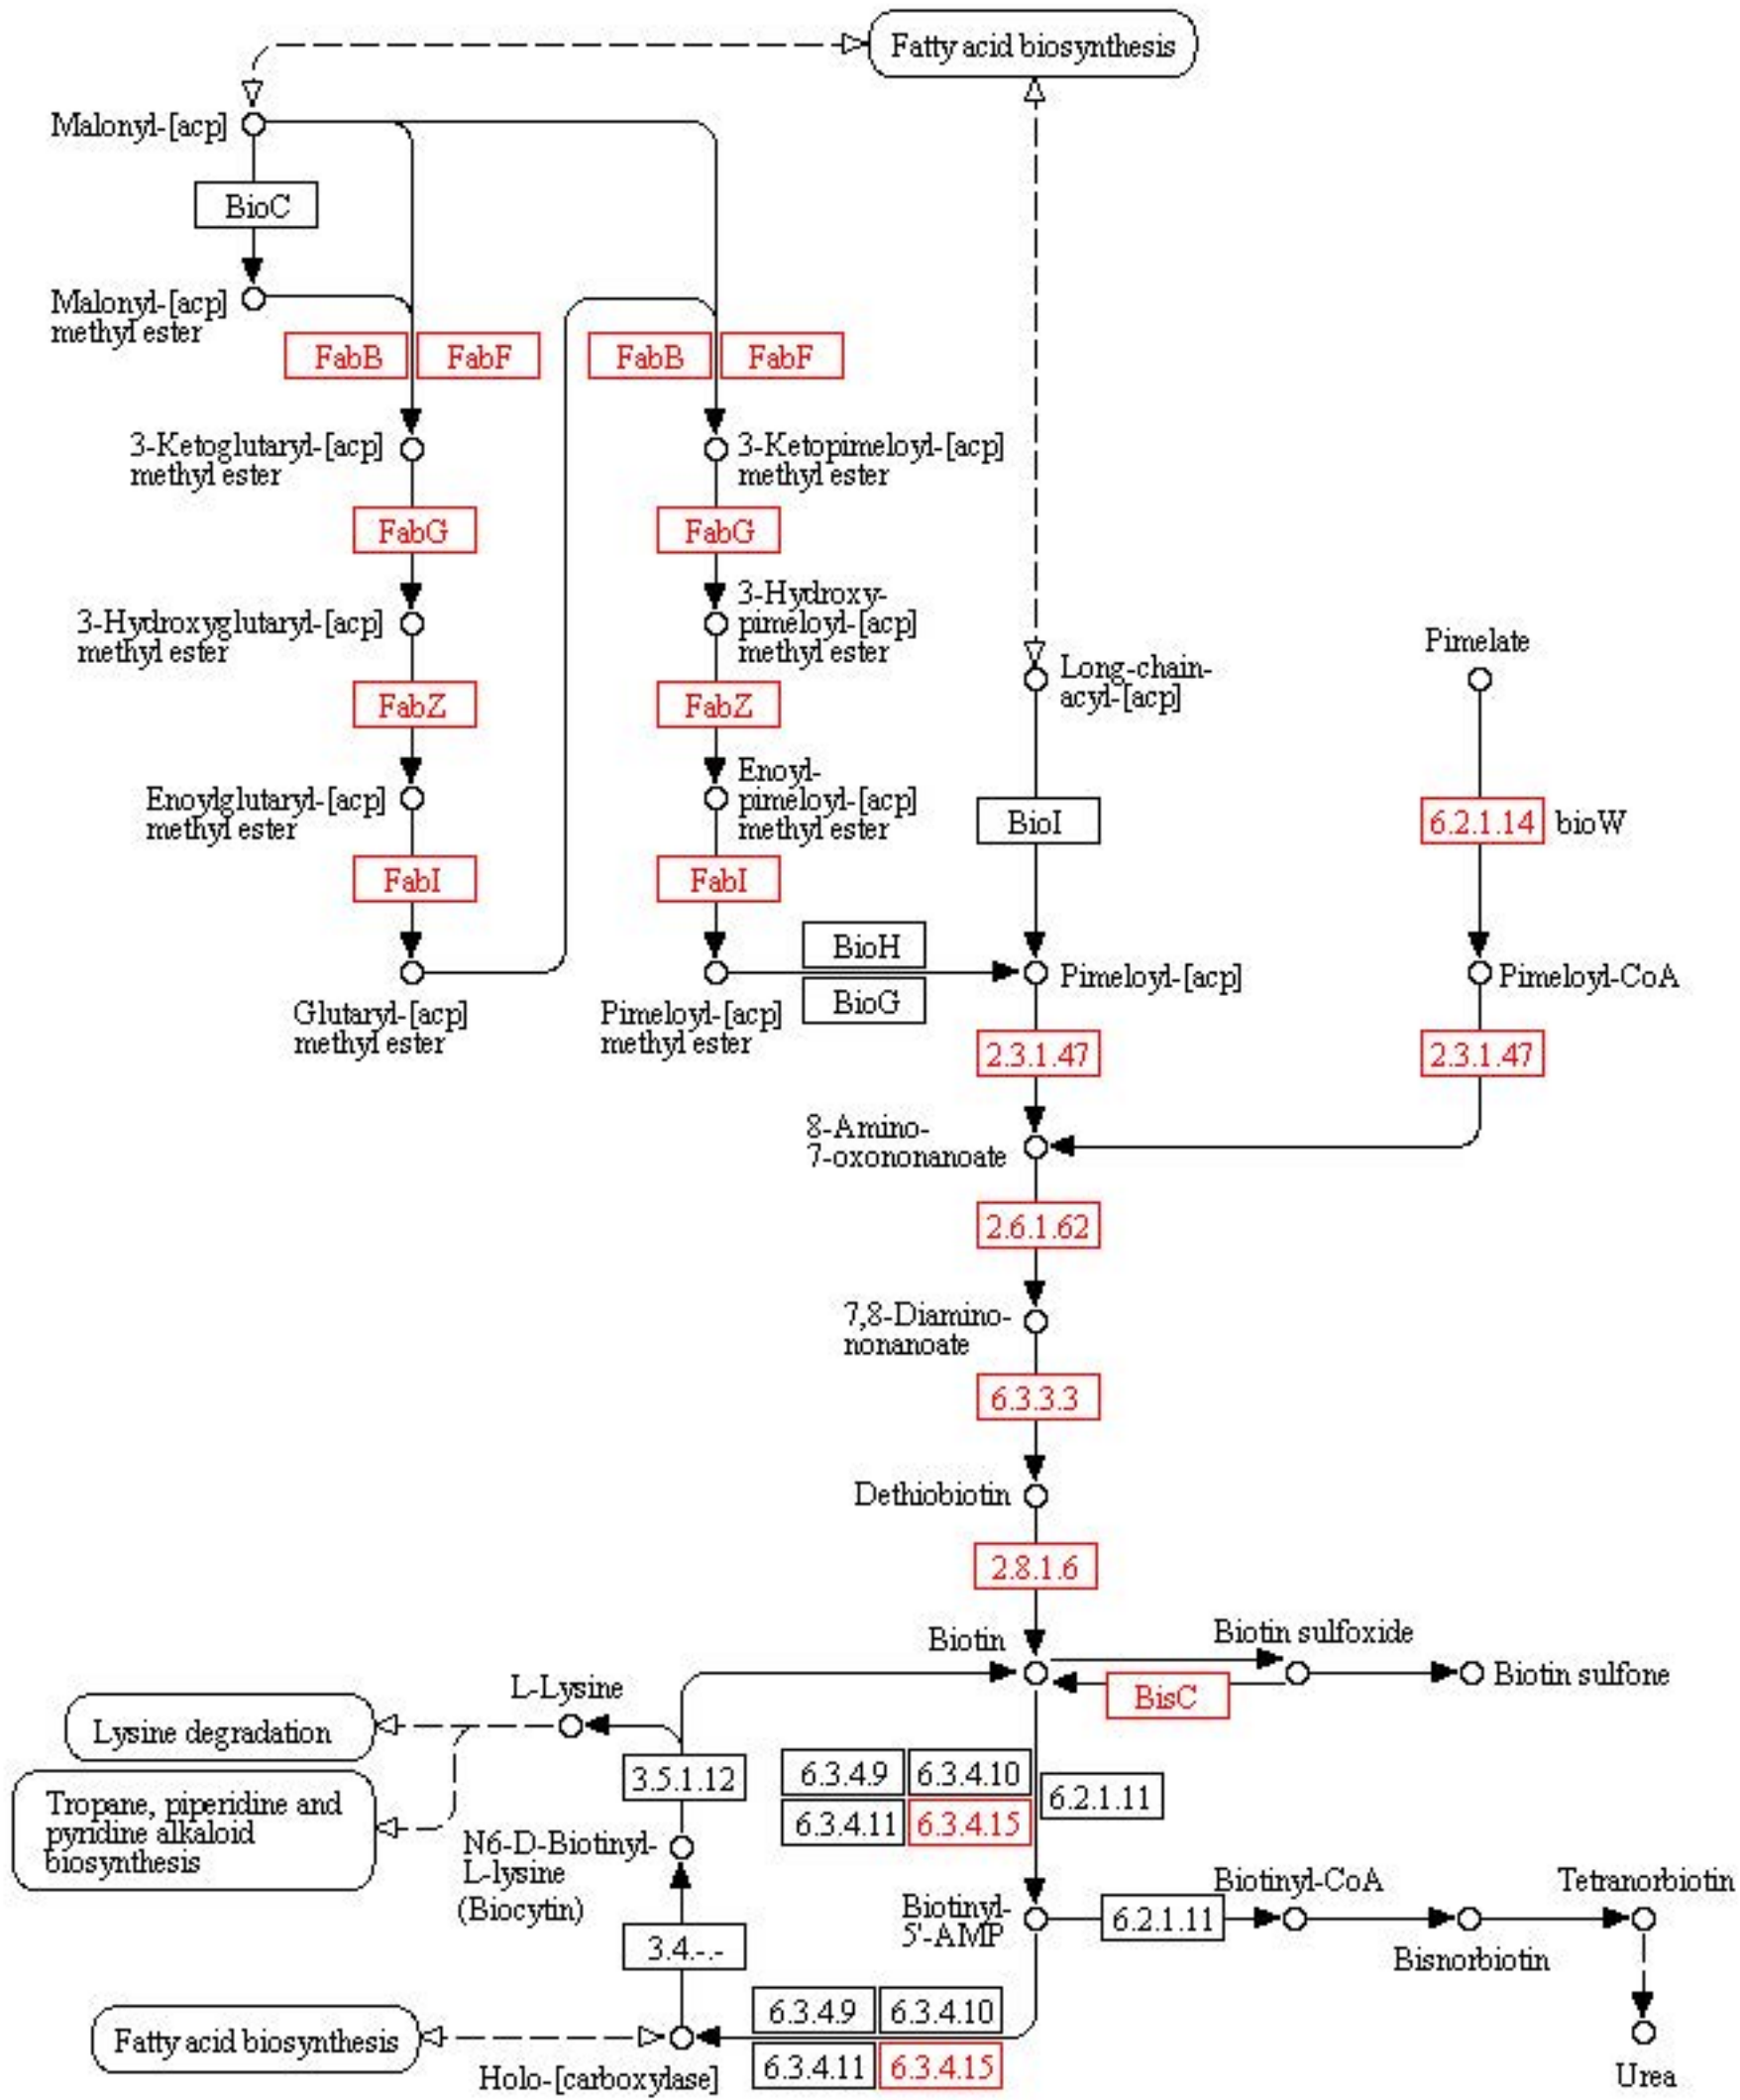

# LIPOIC ACID METABOLISM

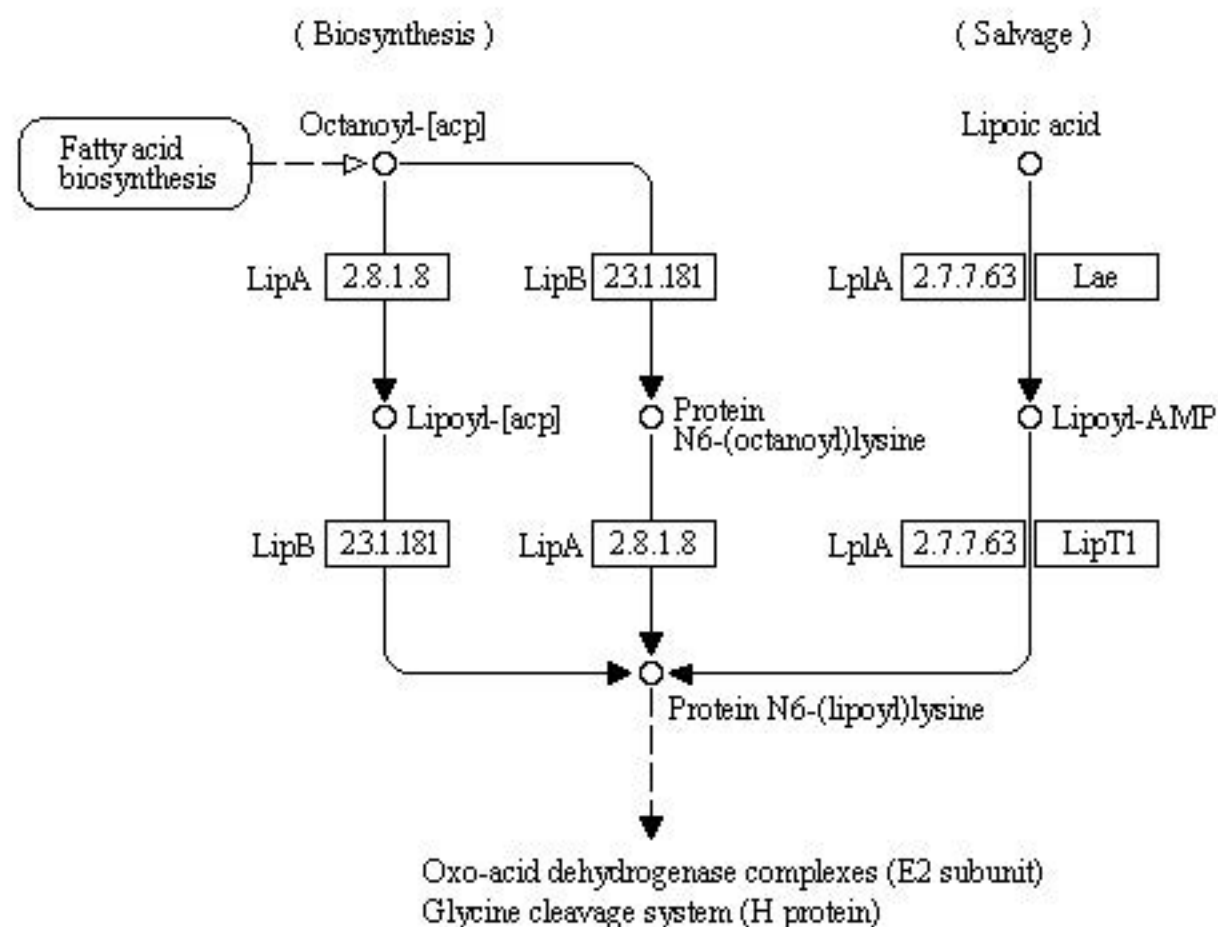

# FOLATE BIOSYNTHESIS

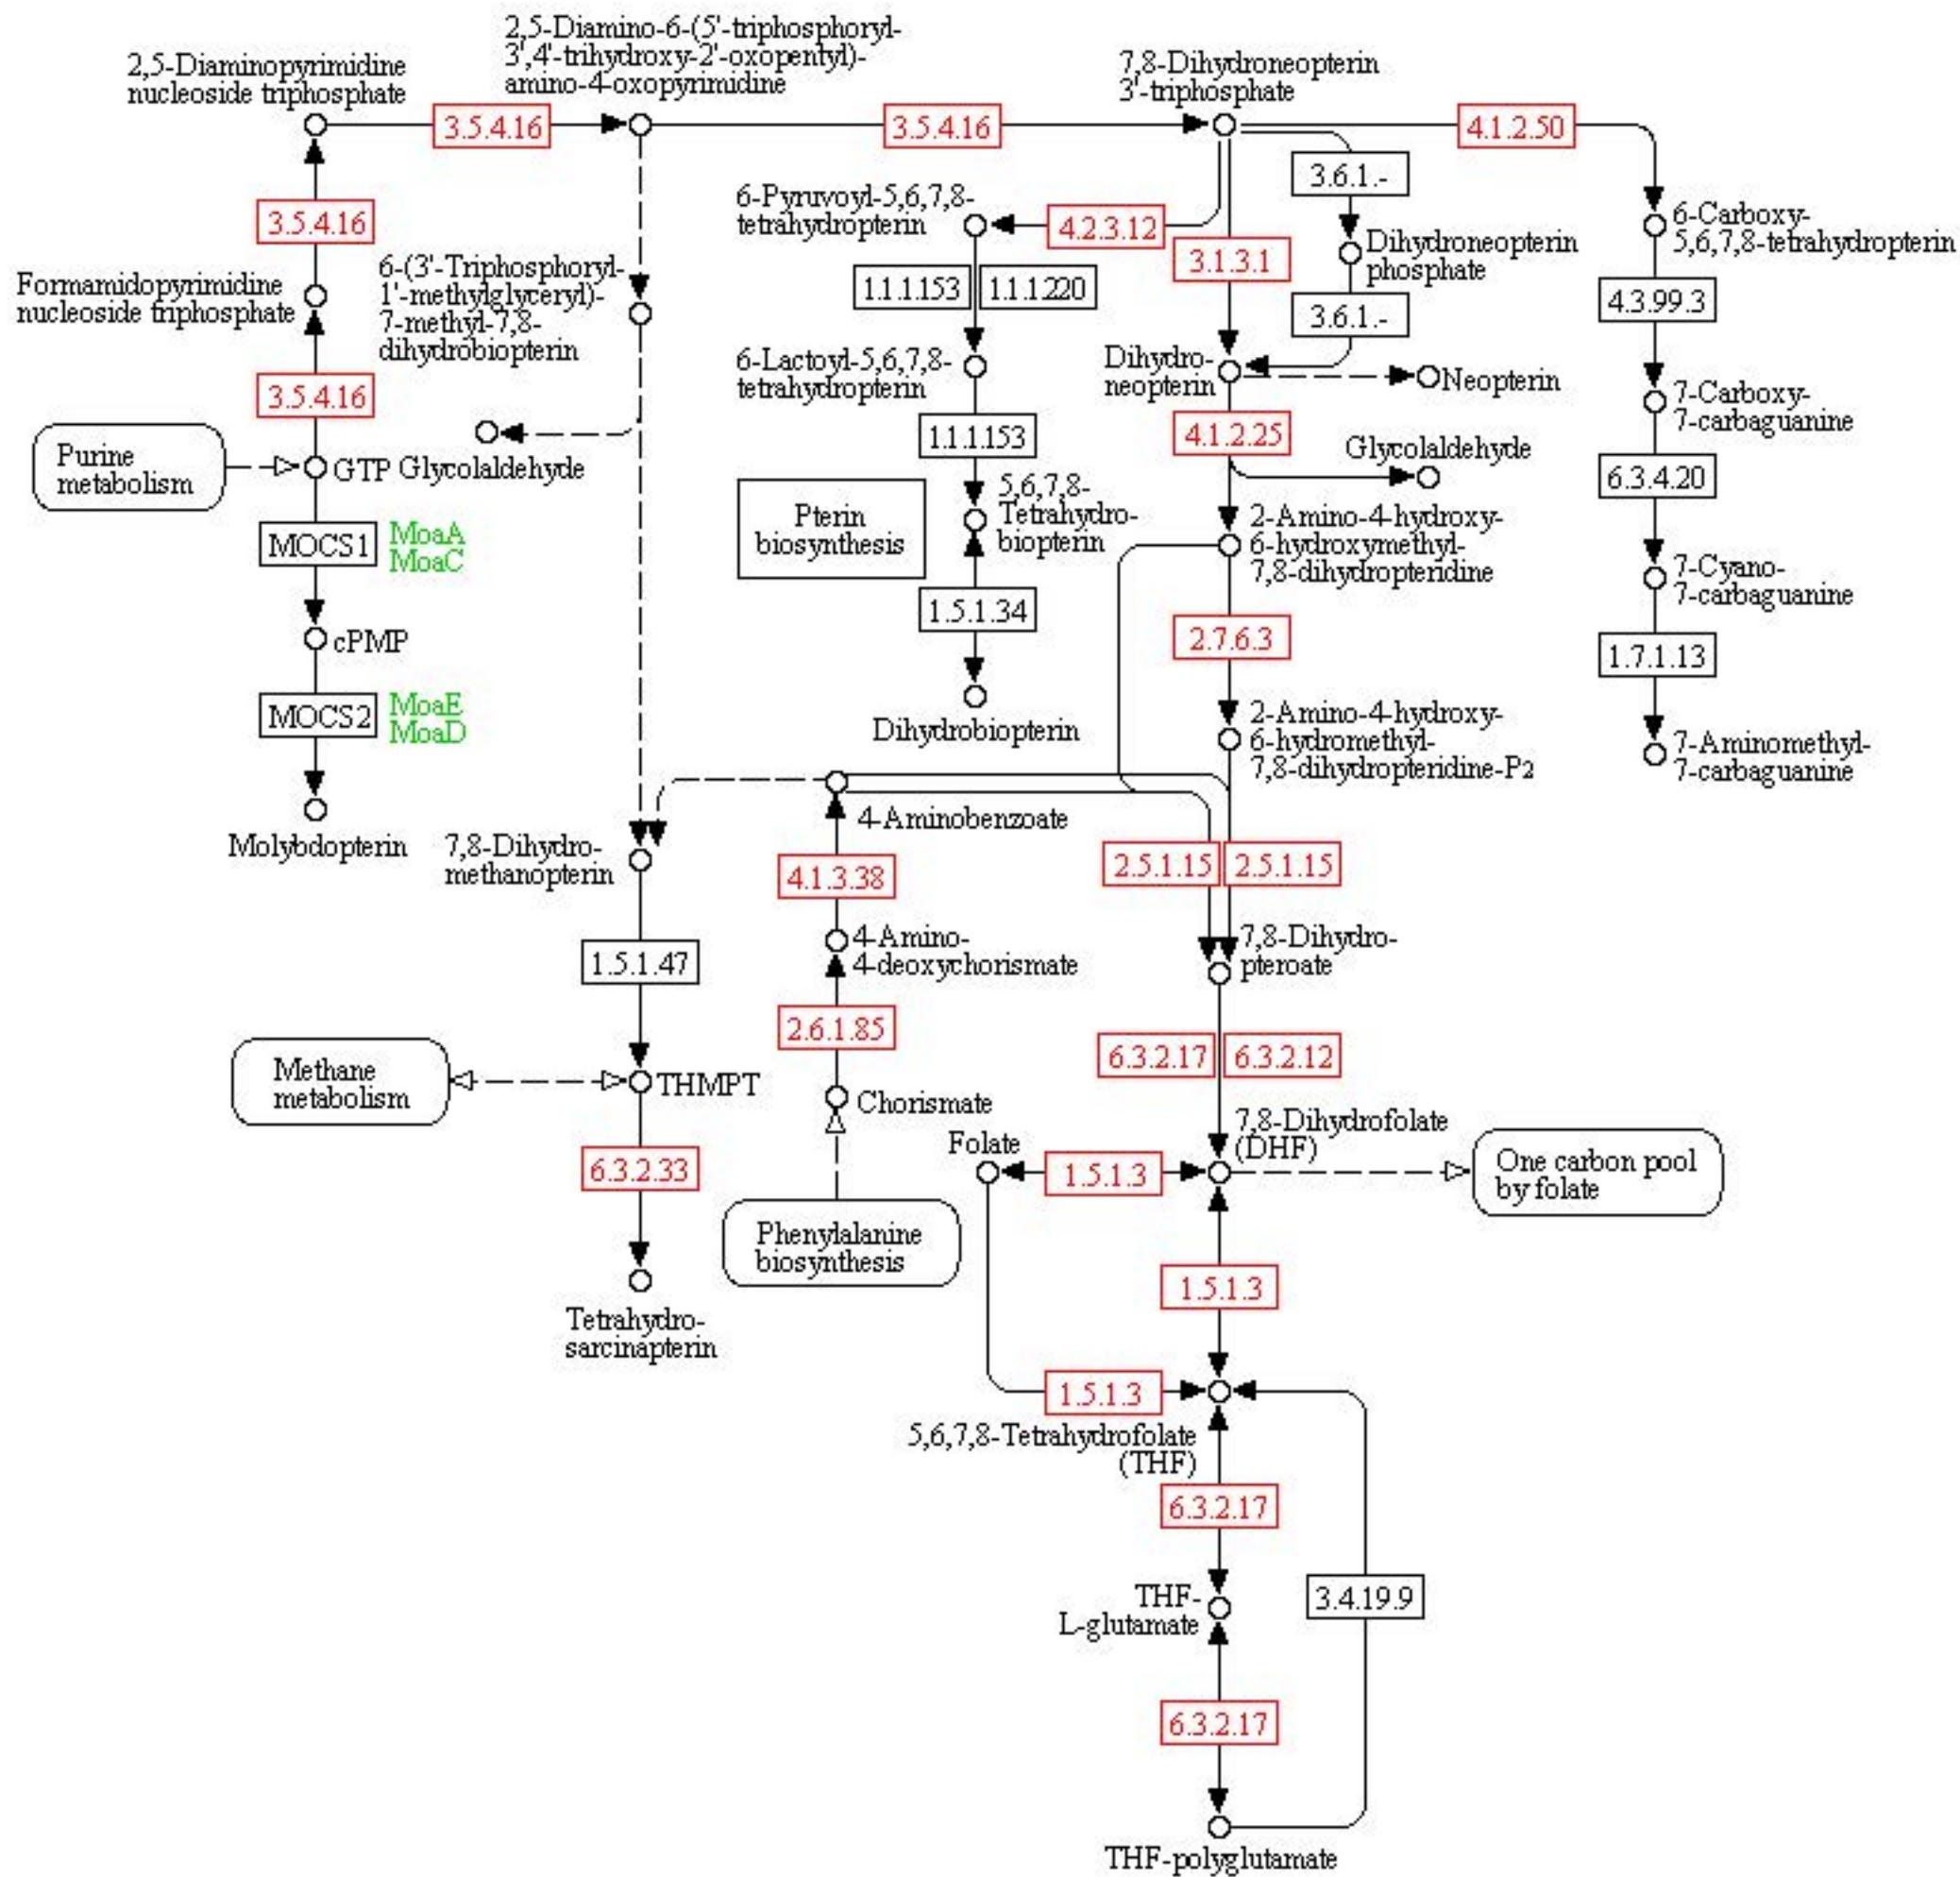

# ONE CARBON POOL BY FOLATE

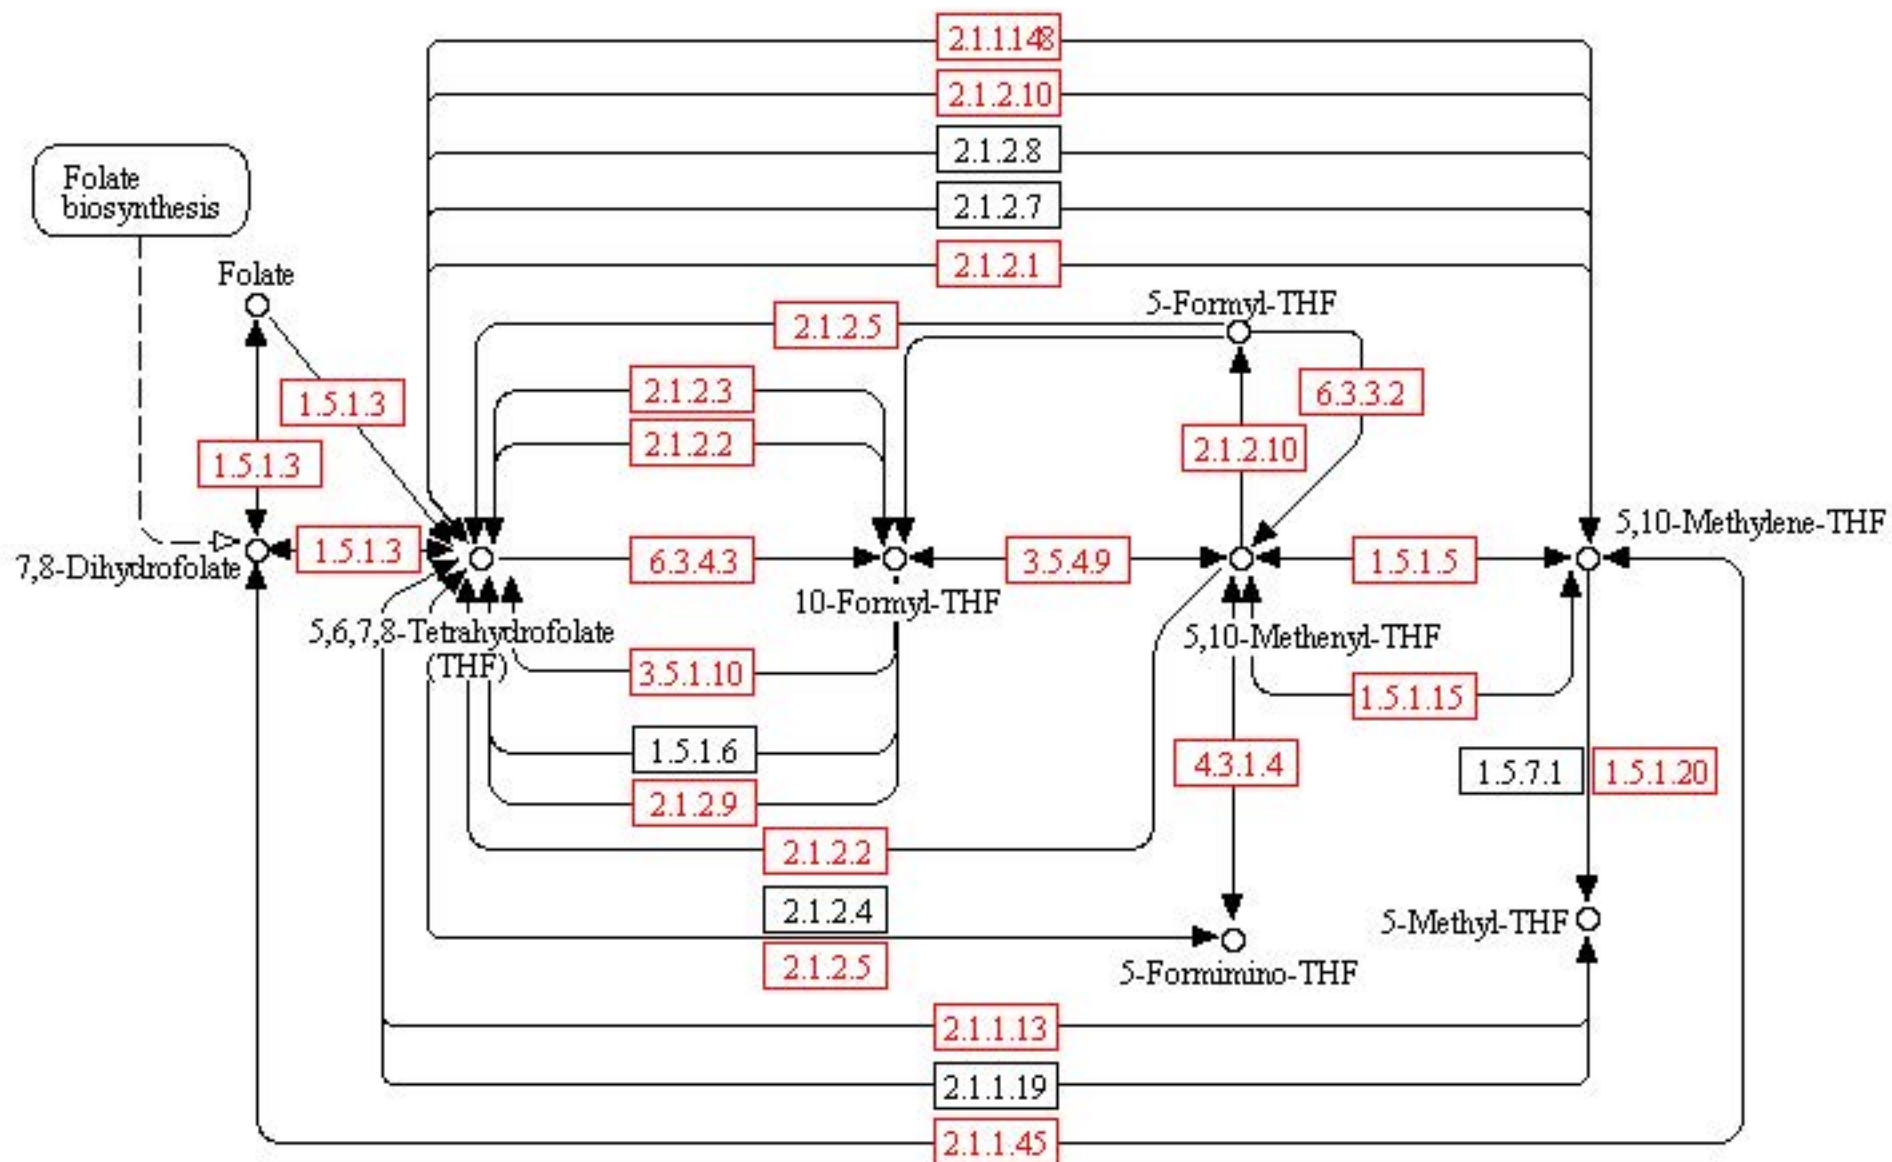

PORPHYRIN AND CHLOROPHYLL METABOLISM

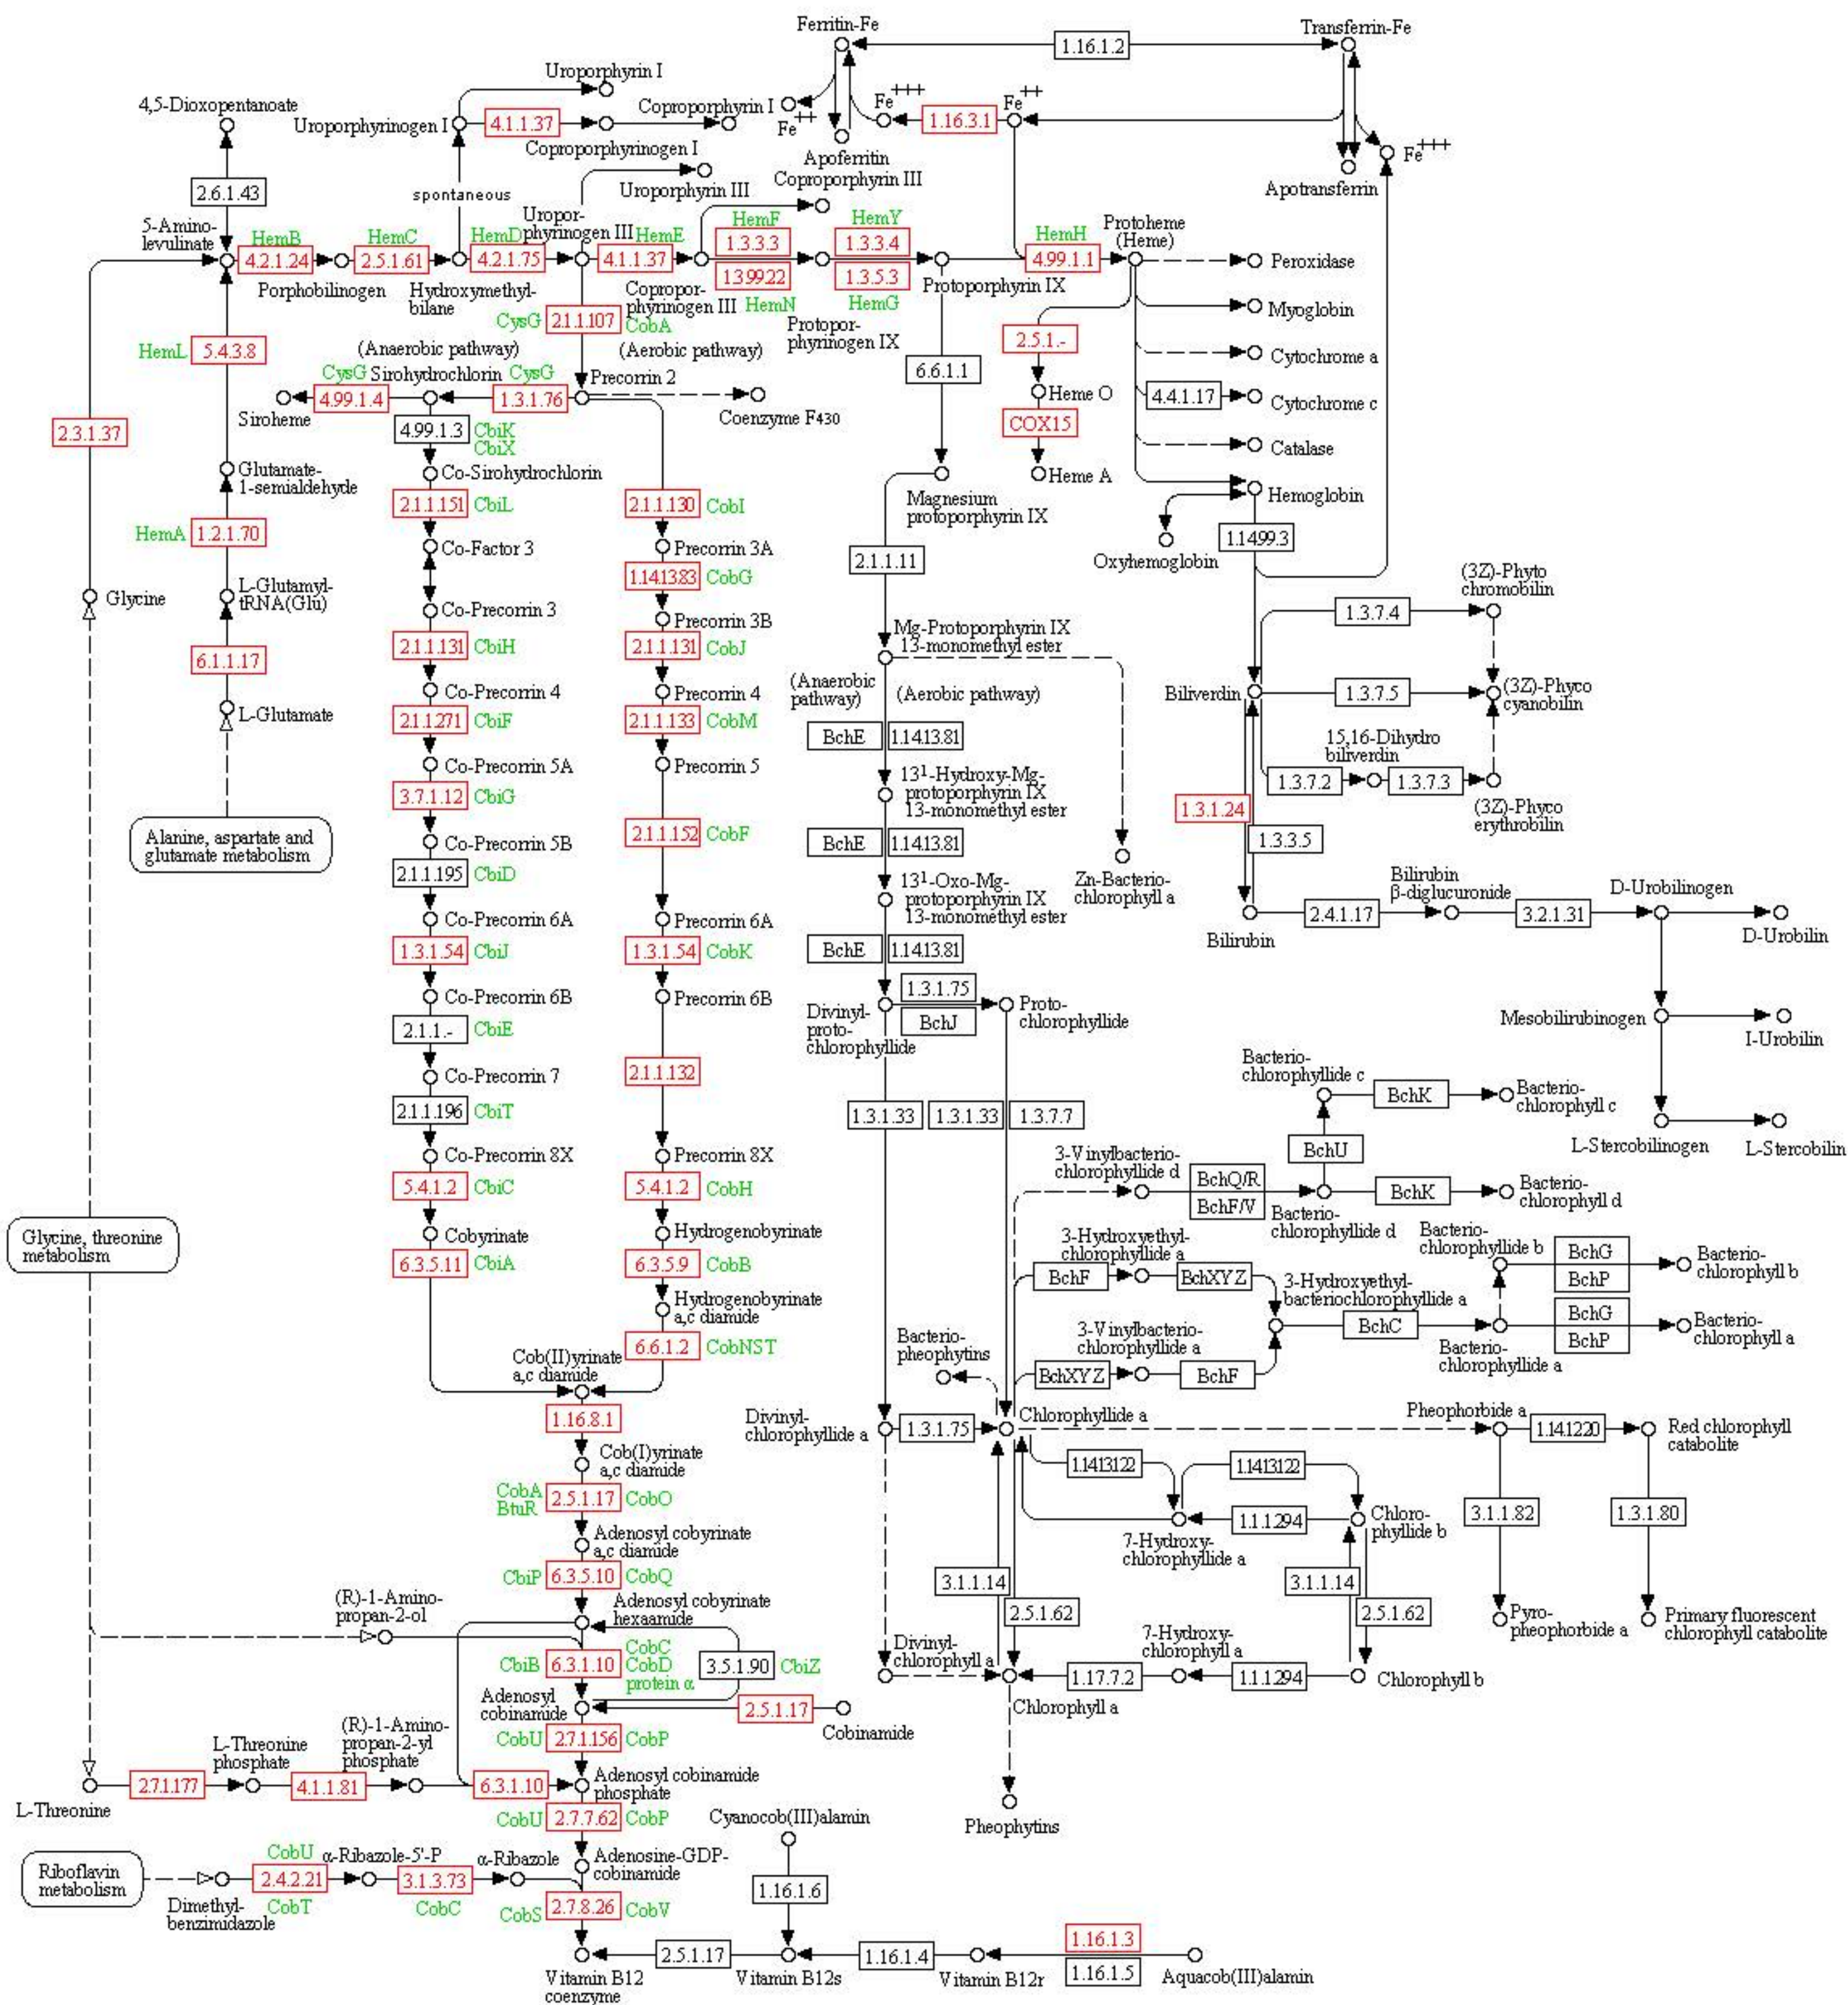

UBIQUINONE AND OTHER TERPENOID-QUINONE BIOSYNTHESIS

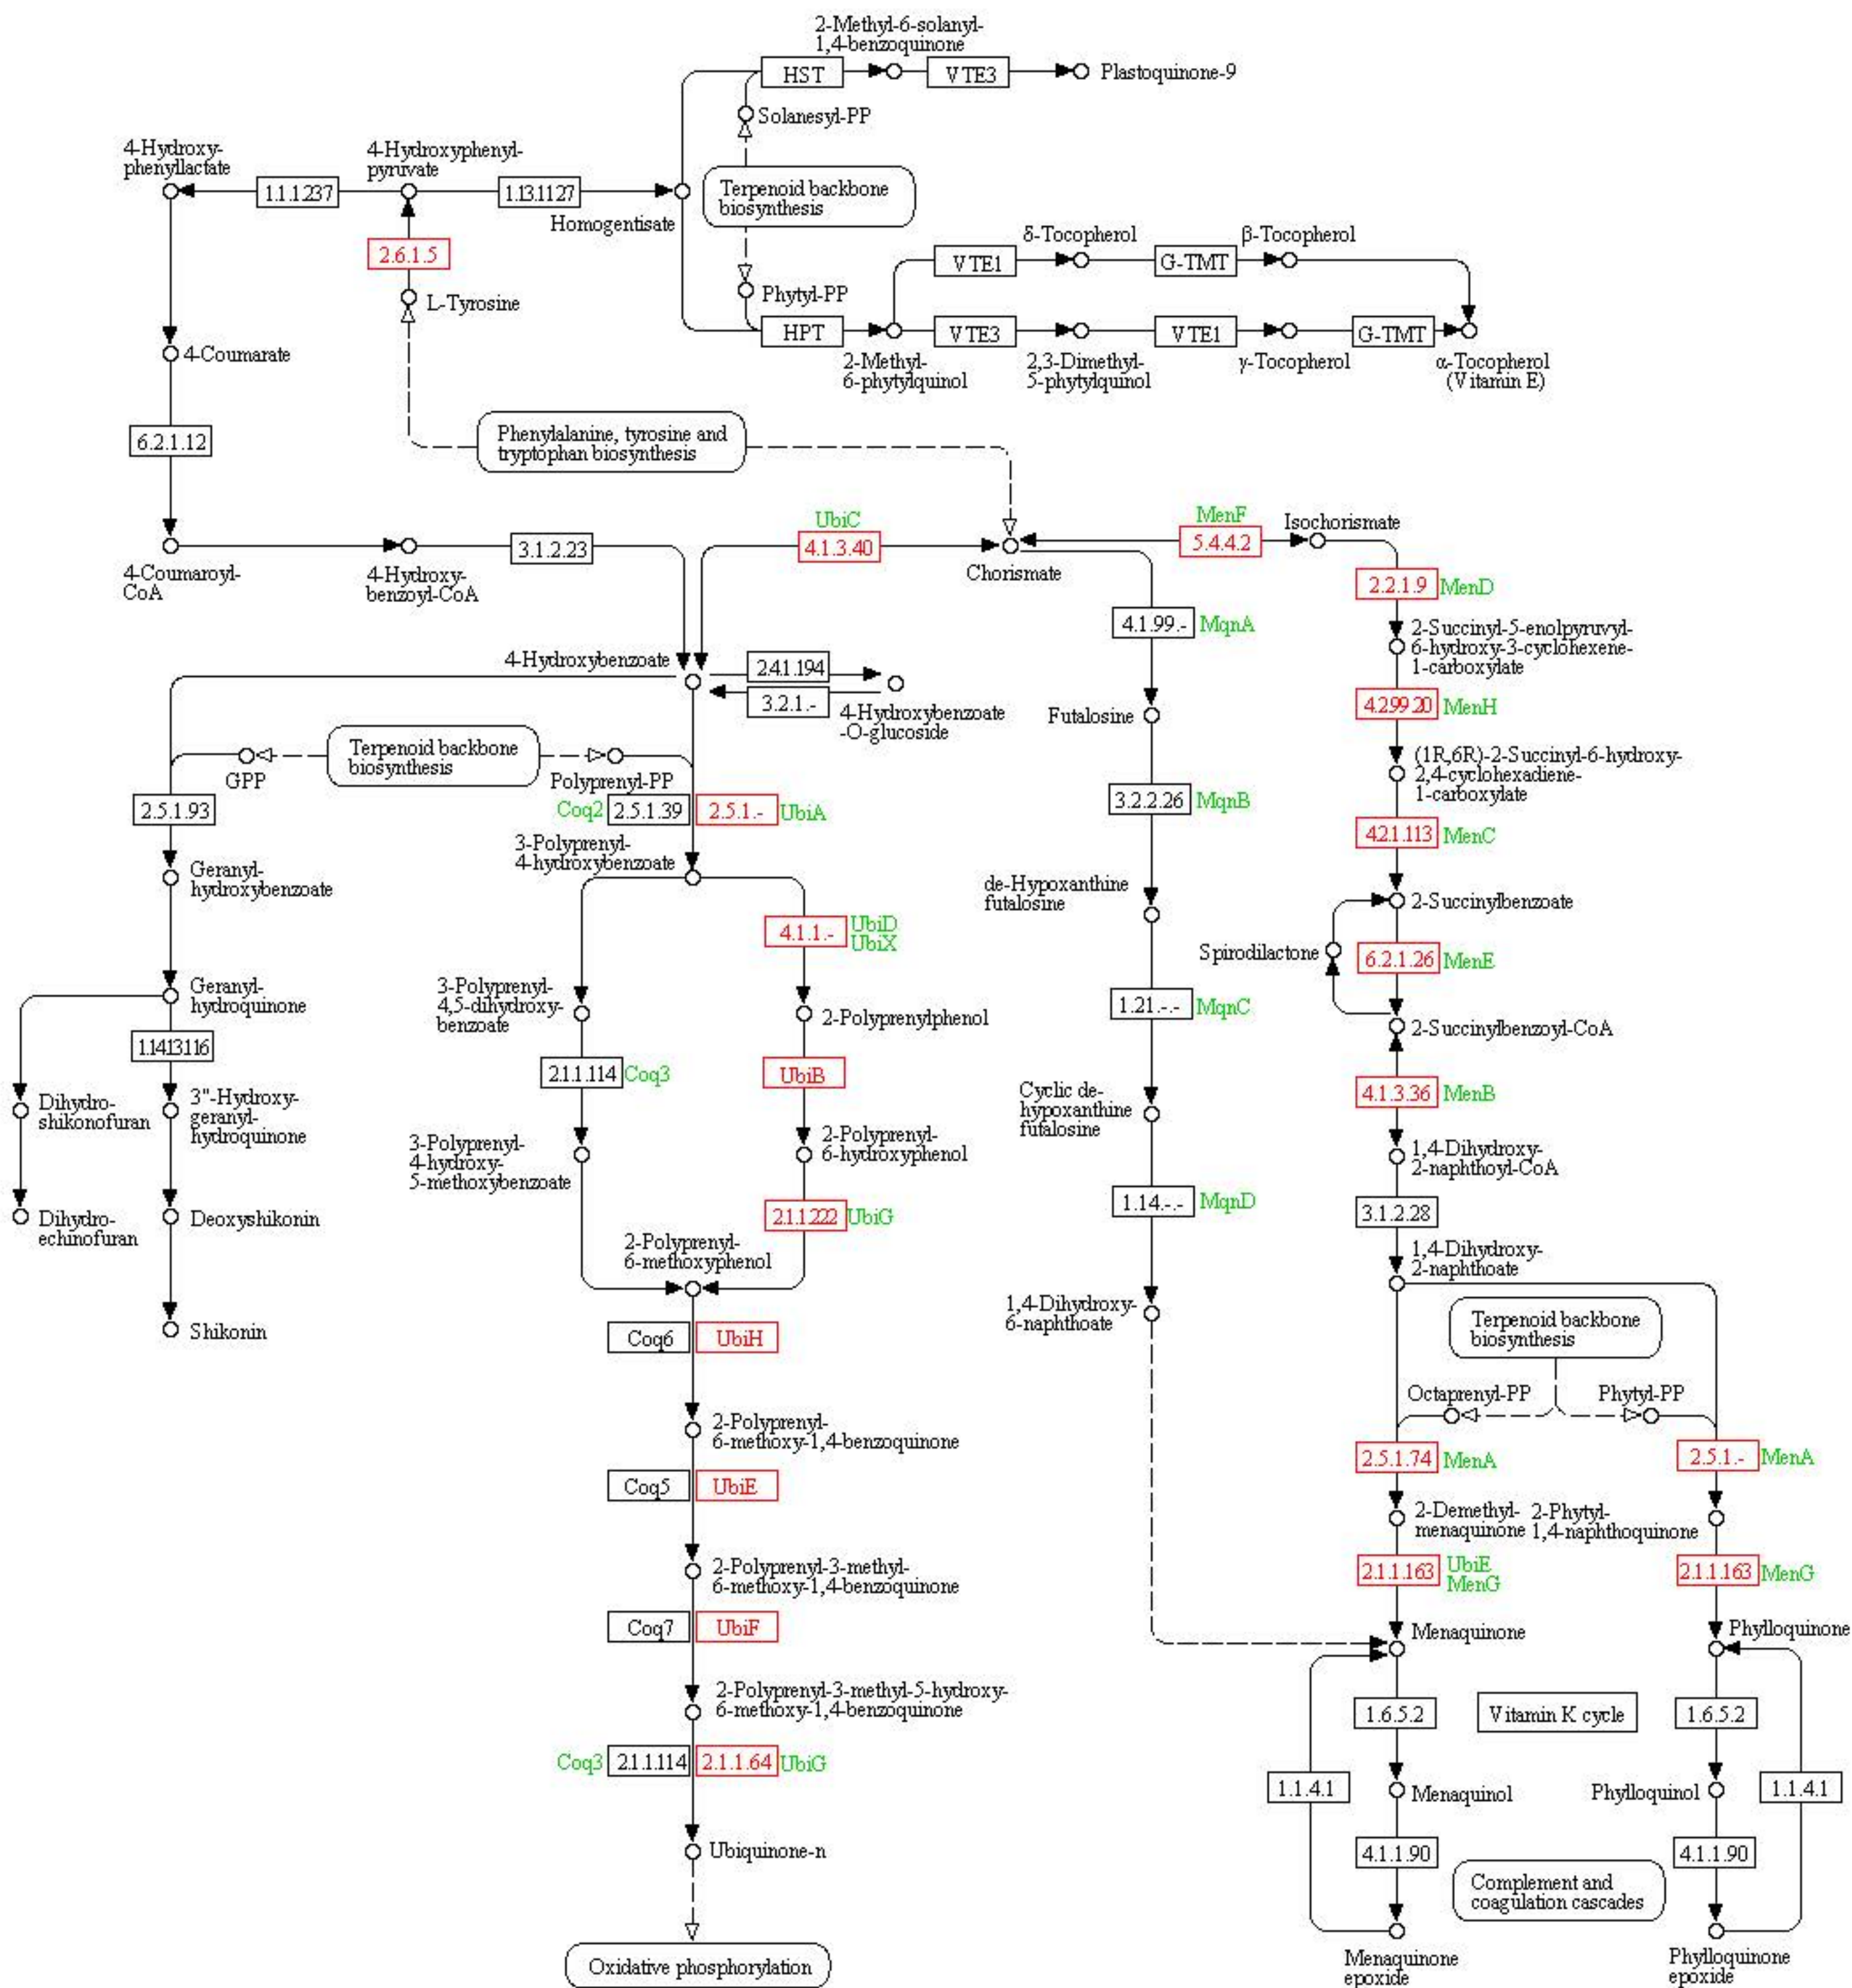

Supplement: 1752-0509-8-41-S7.pdf [file 1752-0509-8-41-S7.pdf]
