# Supplementary material for: Genome-scale metabolic reconstructions of Bifidobacterium adolescentis L2-32 and Faecalibacterium prausnitzii A2-165 and their interaction
Source: PubMed Central journal article supplement (PMC4108055; doi:10.1186/1752-0509-8-41), 2014-04-03

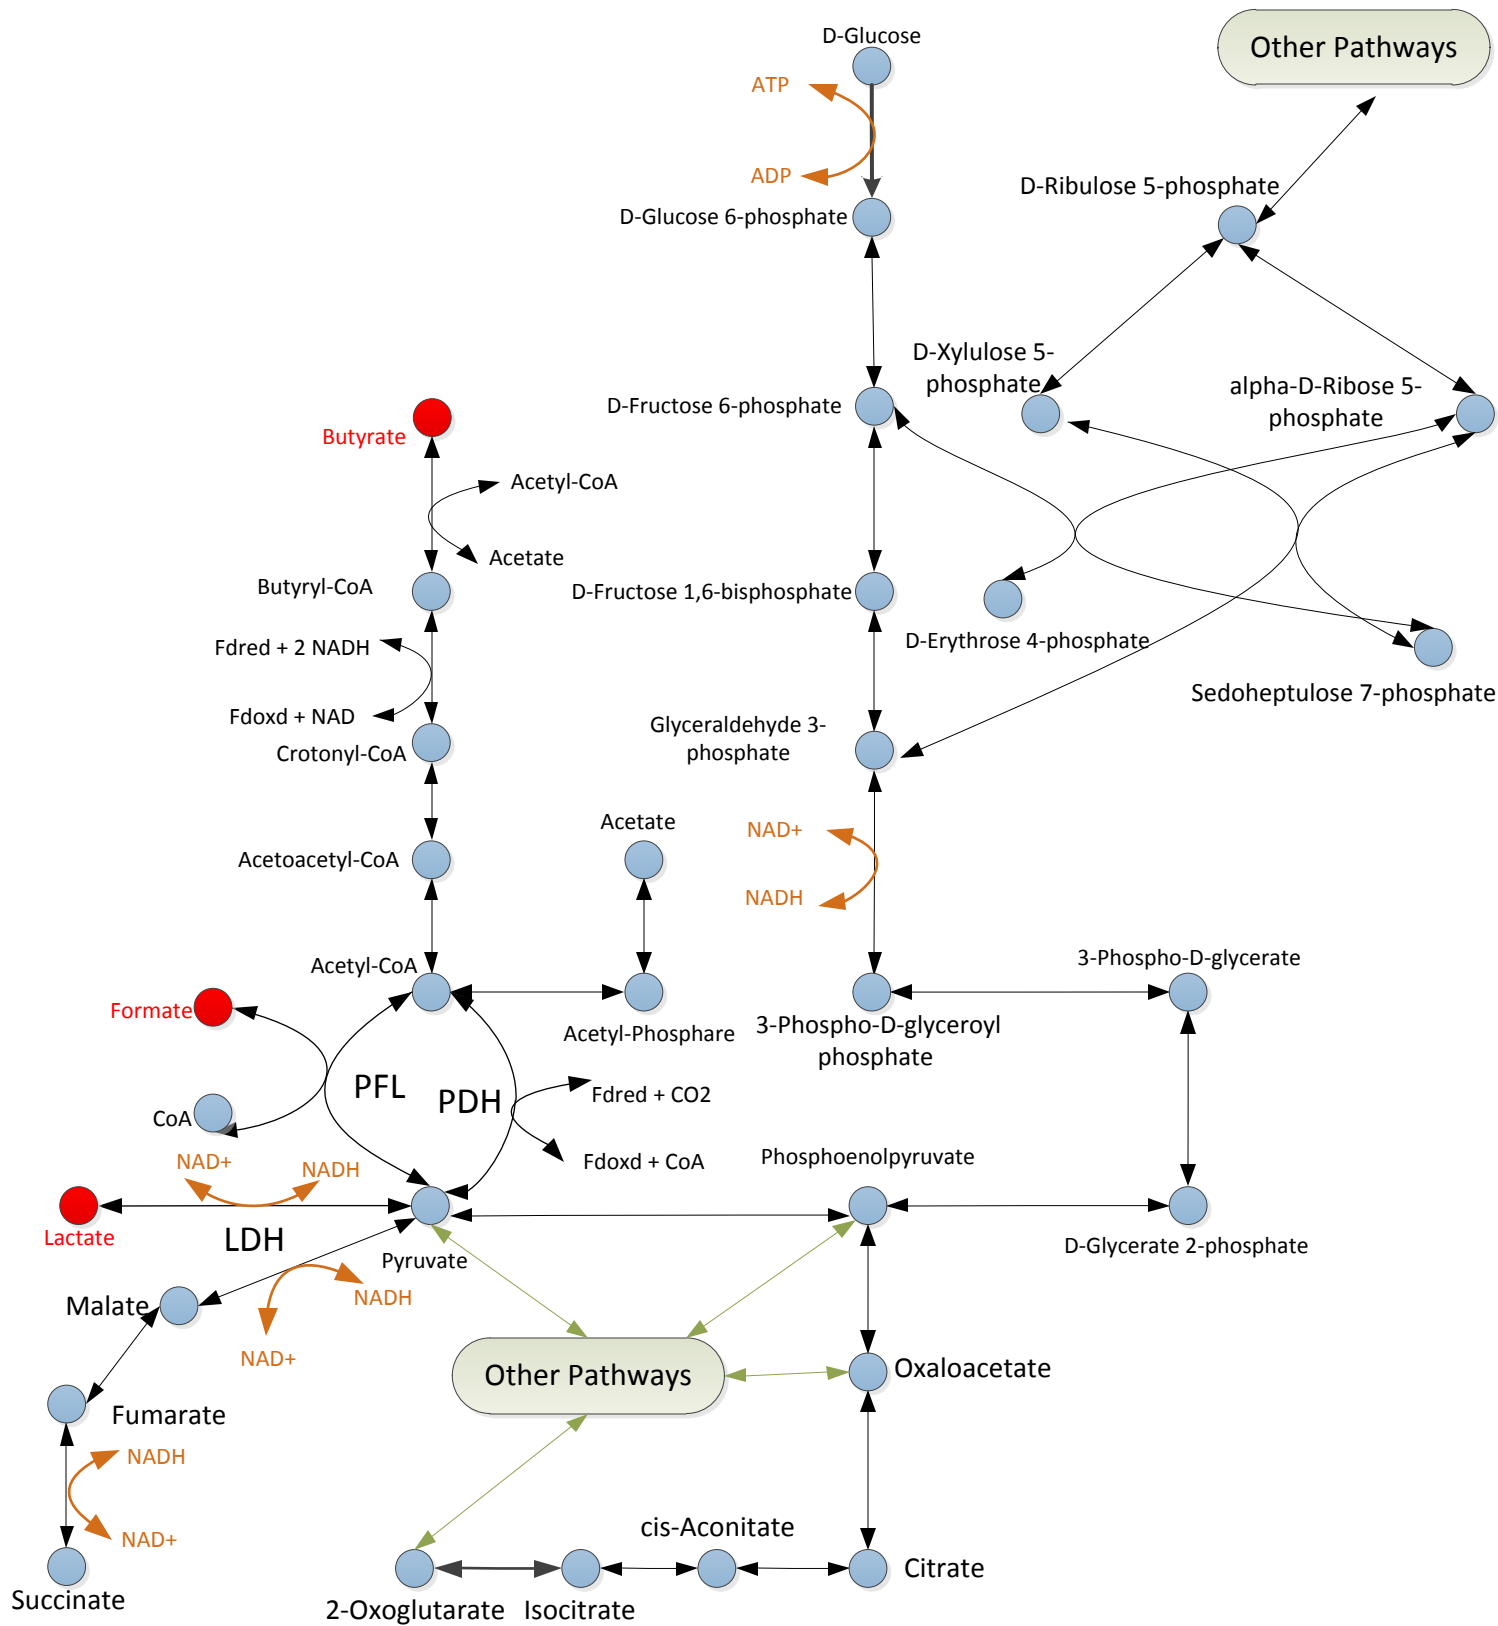

Supplement: 1752-0509-8-41-S10.pdf [file 1752-0509-8-41-S10.pdf]
